1 **The transcriptional regulator Sin3A balances IL-17A and Foxp3 expression**  
2 **in primary CD4 T cells**

3

4 Laura Perucho<sup>1</sup>, Laura Icardi<sup>1</sup>, Elisabetta Di Simone<sup>1</sup>, Veronica Basso<sup>1</sup>, Amaia Vilas  
5 Zornoza<sup>2,3</sup>, Teresa Lozano<sup>4</sup>, Felipe Prosper<sup>2,3</sup>, Juan José Lasarte<sup>4</sup> and Anna Mondino<sup>1</sup>

6

7 <sup>1</sup>Lymphocyte Activation Unit, Division of Immunology, Transplantation and Infectious  
8 Diseases, IRCCS San Raffaele Scientific Institute, Via Olgettina, 58. 20132 Milan, Italy.

9 <sup>2</sup>Area de Hemato-Oncología, Centro de Investigación Médica Aplicada, IDISNA, Ciberonc,  
10 Universidad de Navarra, Pamplona, Spain.

11 <sup>3</sup>Centro de Investigación Biomédica en Red de Cáncer (CIBERONC), Pamplona, Spain.

12 <sup>4</sup>Programa de Inmunología e Inmunoterapia, Centro de Investigación Médica Aplicada,  
13 IDISNA, Universidad de Navarra, Pamplona, Spain.

14

15 Correspondence to: Anna Mondino, Ph.D. IRCCS San Raffaele Scientific Institute, Milan,  
16 Italy. [anna.mondino@hsr.it](mailto:anna.mondino@hsr.it)

17

18 Running title: Sin3A shapes the immunoregulatory potential of Th17 cells

19

20 Statement: This study identifies a new role for the transcriptional regulator Sin3A in the shaping  
21 of Th17 cell differentiation. Data indicate that by controlling IL-2 expression, and mTORC1  
22 signaling, it balances IL-17A and Foxp3 levels, shaping Th17 inflammatory potentials.

23

24

1 **Abstract**

2

3 The Sin3 transcriptional regulator homolog A (Sin3A) is the core member of a multi-protein  
4 chromatin-modifying complex known to control gene transcription via epigenetic mechanisms.  
5 Its inactivation in developing thymocytes halts T cell maturation. We and others had previously  
6 shown that Sin3A controls STAT3 transcriptional activity. Given the role of STAT3 in the  
7 differentiation of T helper 17 cells critical in inflammatory disorders and against opportunistic  
8 infections, we asked whether Sin3A could also contribute to their differentiation. To this aim,  
9 we exploited CD4-Cre and CD4-CreER<sup>T2</sup> deleter strains for conditional and inducible Sin3A  
10 deletion in CD4 cell subsets. We report that Sin3A inactivation *in vivo* arrested thymocyte  
11 development at the double positive stage, hindering the characterization of mature T cells. At  
12 difference, tamoxifen-inducible Sin3A deletion proved permissive for *in vitro* proliferation of  
13 T cells in Th17 skewing conditions and the acquisition of memory markers. Transcriptional  
14 profiling indicated that while Sin3A inactivation imprinted T cells with a mTORC1 signaling  
15 gene signature, Sin3A deficient cells lacked the expression of IL-17A, the signature Th17  
16 cytokine. This reflected a defective induction of *Il17a*, and also of the *Il23R* and *Il22* genes,  
17 which occurred in spite of proper upregulation of the lineage defining transcription factor  
18 ROR $\gamma$ t. We found that Sin3A inactivation was paralleled by increased STAT3 phosphorylation  
19 and nuclear representation, and by higher fractions of IL-2 and FoxP3 expressing cells. Such  
20 events proved causally linked as inhibiting Foxp3 partially rescued IL-17A expression, and  
21 neutralizing IL-2 simultaneously lowered the representation of FoxP3<sup>+</sup> cells, while rescuing IL-  
22 17A<sup>+</sup> ones. Thus, together our data underline a previously unappreciated role for Sin3A in  
23 Th17 differentiation and the shaping of their immunoregulatory potential.

24

## 1 **Introduction**

2 The Sin3 transcriptional regulator homolog A (Sin3A) is the core component of a multi-protein  
3 chromatin-modifying complex. While initially defined as a co-repressor, Sin3A is now  
4 considered a co-regulator, since it has co-repressor, co-activator and transcription factor  
5 properties (Chaubal & Pile, 2018). Sin3A contains four paired amphipathic helix domains  
6 (Ayer *et al*, 1995; Schreiber-Agus *et al*, 1995), each of them specific for particular  
7 transcriptional regulators. Through a class I histone deacetylases (HDAC) interaction domain  
8 (HID), Sin3A binds HDAC1 and HDAC2 and influences chromatin structures (Alland A,  
9 Muhle R, Hou Jr H, Potes J, Chin L, Schreiber-Angus N, 1997; Nagy *et al*, 1997; Laherty *et al*,  
10 1997). Sin3A-associated HDAC1/2-activity is essential for embryonic stem cell survival  
11 (Fazio *et al*, 2008), hematopoiesis, hematopoietic stem cell homeostasis and T and B  
12 lymphocyte development (Heideman *et al*, 2014). While HDAC activities are regarded as  
13 predominant, other chromatin modifiers were also found in Sin3A complexes, including histone  
14 methyltransferases (Nakamura *et al*, 2002), O-linked N-acetylglucosamine transferase (Yang  
15 *et al*, 2002), or members of the Swi/Snf nucleosome remodeling complex (Pal *et al*, 2003).  
16 Sin3A deletion caused the deregulation of genes involved in cell cycle, DNA replication, DNA  
17 repair, apoptosis, chromatin modification, mitochondrial metabolism and cell differentiation *in*  
18 *vitro* (Dannenber *et al*, 2005), and early embryonic lethality (Dannenber *et al*, 2005; Cowley  
19 *et al*, 2005; McDonel *et al*, 2012). Its conditional inactivation at the double negative (DN) stage  
20 of thymocyte development was found to cause a reduction in cellularity accompanied by an  
21 arrest in CD8 T cell selection and the appearance of dysfunctional CD4<sup>+</sup> T cells (Cowley *et al*,  
22 2005).  
23 In previous studies, Sin3A was shown to regulate the transcriptional activity of the signal  
24 transducer and activator of transcription 3 (STAT3) (Gambi *et al*, 2019; Icardi *et al*, 2012),  
25 which is central to differentiation of Th17 cells. These cells mediate immunity against fungal  
26 infections and extracellular bacteria (Ye *et al*, 2001) through the secretion of several

1 proinflammatory cytokines including IL-17A, IL-17F, IL-21, IL-22, IL-9, GM-CSF, TNF $\alpha$  and  
2 CCL20 (Dong, 2008; Liang *et al*, 2006). Complex signaling networks shape differentiation of  
3 Th17 cells (Yosef *et al*, 2013). Signals originated through the T-cell receptor (TCR) and co-  
4 stimulatory molecules, such as CD28, in the presence of IL-6 (Das *et al*, 2009) activate a  
5 number of transcription factors, among which is STAT3, which is required during early Th17  
6 cell differentiation (Yang *et al*, 2007a; Zhou *et al*, 2007; Mathur *et al*, 2007). STAT3, in turn,  
7 controls the expression of the retinoic-acid-receptor related orphan receptor- $\gamma$  (ROR $\gamma$ t), the  
8 lineage-specific transcriptional regulator of Th17 (Ivanov *et al*, 2006). IL-6 and TGF- $\beta$  also  
9 cause the STAT3-dependent expression of IL-21, which act via an autocrine loop to promote  
10 ROR $\gamma$ t-dependent IL-17 expression (Korn *et al*, 2007; Wei *et al*, 2007; Korn *et al*, 2009).  
11 Transcription cofactors have also been shown to regulate Th17 cell development (Jiang *et al*,  
12 2019). In addition to act on gene transcription, STAT3 has been shown to control mitochondrial  
13 Ca<sup>2+</sup> and membrane potential, contributing to CD4<sup>+</sup> T cell differentiation (Rincon & Pereira,  
14 2018; Yang *et al*, 2015).

15 Given the role of STAT3 in Th17 cell differentiation, and the finding that Sin3A controls  
16 STAT3 in other cell types (Icardi *et al*, 2012; Gambi *et al*, 2019), we hypothesized that Sin3A  
17 could contribute to CD4<sup>+</sup> T cell differentiation. To define the role of Sin3A and understand the  
18 consequences of its inactivation in CD4 cells, we crossed Sin3A<sup>F/F</sup> mice with CD4-Cre, CD4-  
19 CreER<sup>T2</sup> and Rosa26-CreER<sup>T2</sup> deleter strains, allowing deletion of Sin3A *in vivo* at the DP  
20 stage of thymic development and *in vitro* in mature T cells. Data underline a previously  
21 unappreciated role for Sin3A CD4 T cells and in particular in fine tuning IL-2, mTOR and  
22 STAT3 signaling over the course of Th17 differentiation, balancing IL-17A and Foxp3  
23 expression, ultimately shaping Th17 cell effector functions.

24

## 1 **Materials and methods**

### 2 **Mice**

3 Mice were housed and bred in the San Raffaele Institutional specific pathogen-free animal  
4 facilities. Mice used in this study were backcrossed with C57BL/6J mice (>10 generations).  
5 Mice carrying Sin3A-floxed alleles (Dannenberg *et al*, 2005) (Sin3A<sup>F/F</sup>; gently provided by Dr.  
6 Jan Tavernier, Ghent University and Hospital, Ghent University, 9000 Ghent, Belgium) were  
7 crossed with CD4-Cre (Lee *et al*, 2001) (gently provided by Dr. Paolo Dellabona, San Raffaele  
8 Institute), CD4-CreER<sup>T2</sup> (gently provided by Burkhard Becher, University of Zurich), or  
9 Rosa26-CreER<sup>T2</sup> (Ventura *et al*, 2007) (gently provided by Dr. Marco Bianchi, San Raffaele  
10 Institute) transgenic mice to generate Sin3A<sup>F/F</sup> CD4-Cre<sup>+/-</sup>, Sin3A<sup>F/F</sup> CD4-CreER<sup>T2</sup> <sup>+/-</sup> and  
11 Sin3A<sup>F/F</sup> Rosa26-CreER<sup>T2</sup><sup>+/-</sup> mice, respectively. Sin3A<sup>F/F</sup> mice were also crossed with OT II  
12 mice (gently provided by Dr. Andrea Annoni, San Raffaele Institute) and subsequently with  
13 Rosa26-CreER<sup>T2</sup><sup>+/-</sup> mice. Mice were screened by PCR. The following primers were used to  
14 detect the floxed (250 bp) or wild-type (150 bp) Sin3A allele: 5'-  
15 CAGATCCTATTCCAGGTGTCAAAG and 5'-CATGTTCATGTTTAGATATACTTCG.  
16 The presence (390 bp) of Cre was also investigated by PCR with the following primers 5'-  
17 CCTGGAAAATGCTTCTGTCCG and 5'-CAGGGTGTATAAGCAATCCC. Studies were  
18 performed in accordance with the European Union guidelines and with the approval of the San  
19 Raffaele Institute Institutional Ethical Committee (Milan, Italy; IACUC-814).

20

### 21 **T Cell Activation and Differentiation**

22 CD4<sup>+</sup> T cells were isolated by negative selection from spleens and lymph nodes (Miltenyi  
23 Biotec, #130-104-454) according to manufacturer's instructions (typically >95% purity). To  
24 initiate Sin3A deletion, CD4<sup>+</sup> T cells were then cultured for 6 days in RPMI supplemented with  
25 5% FBS, L-Glutamine, Pen/Strep, β-mercaptoethanol and IL-7 (5 ng/mL) in the absence or the  
26 presence of 4-OH tamoxifen (TAM, 1 μM). Cells (1 x 10<sup>6</sup>/mL) were then recovered and

1 activated for 3 days on plate-bound anti-CD3 (BD, #553058) and soluble anti-CD28  
2 (Biolegend, #102116) antibodies in Th17 or Treg skewing conditions. For Th17 differentiation,  
3 T cells were plated on 5 µg/ml plate-bound anti-CD3 and 5 µg/ml anti-CD28 antibodies in  
4 Iscove's Modified Dulbecco's Medium (IMDM) supplemented with 10% FBS, L-Glutamine,  
5 Pen/Strep, β-mercaptoethanol, 50 ng/mL IL-6, 1 ng/mL TGF-β, 10 ng/mL IL-1β, 10 µg/mL  
6 anti-IL-4 and 10 µg/mL anti-IFNγ. For Th0 differentiation, T cells were cultured on 1 µg/ml  
7 plate-bound anti-CD3 and 1 µg/ml soluble anti-CD28 antibodies in RPMI supplemented with  
8 5% FBS, L-Glutamine, Pen/Strep, β-mercaptoethanol, 20 ng/mL IL-2 and 2.3 ng/mL TGF-β.  
9 For Th1 differentiation, cells were cultured as in Th0, supplementing cells with 3 µg/ml anti-  
10 IL-4 and 10 ng/ml IL-12. For Treg differentiation, T cells were cultured on 1 µg/ml plate-bound  
11 anti-CD3 and 5 µg/ml soluble anti-CD28 antibodies in RPMI supplemented with 5% FBS, L-  
12 Glutamine, Pen/Strep, β-mercaptoethanol, 20 ng/mL IL-2 and 2.3 ng/mL TGF-β. All cytokines  
13 used were purchased from Peprotech. After 3 days of activation, cells were stimulated with  
14 Phorbol 12-myristate 13-acetate (PMA) (10 ng/mL, Sigma, #P8139) / ionomycin (1 µg/mL,  
15 Sigma, # I0634) for 4 h, adding Brefeldin A (BFA) (5 µg/mL, sigma, # B7651) for the last 2h  
16 of culture. As control, half of the cells were treated only with BFA. In some experiments, anti-  
17 IL-2 blocking antibody (1 µg/ml unless specified, BioCell #BE0043-1) or the Foxp3 inhibitor  
18 P60(Casares *et al*, 2010) (20 µM) were provided during the 3 days Th17 differentiating cultures.  
19 In experiments using OTII<sup>+/-</sup> Sin3A CreERT2 mice, CD4 T cells were purified as above, kept  
20 for 6 days in RPMI supplemented with 5% FBS, L-Glutamine, Pen/Strep, β-mercaptoethanol  
21 and IL-7 (5 ng/mL) in the absence or the presence of 4-OH tamoxifen (TAM, 1 µM) and then  
22 cultured for 3 days in Th17 conditions in the presence of 1.25 µM ovalbumin (OVA).

23

## 24 **Flow cytometry**

25 Cells were collected, washed in PBS and stained with a viable dye (Zombie Aqua, Biolegend,  
26 #423101) for 20 min on ice in the dark. Cells were then resuspended in Fc-blocking solution

1 (anti CD16/CD32 antibody 2.4G2, homemade), incubated for 5 minutes and then labeled with  
2 indicated antibodies for 15 min at 4°C in the dark. Cells were then washed and fixed for 30 min  
3 to ON at 4°C (Foxp3/Transcription Staining Buffer Set, eBioscience, #00-5523-00). Fixed cells  
4 were permeabilized using the same buffer set and intracellular stainings were performed for 30  
5 min at 4°C in the dark. Stained cells were collected and measured on a BD FACSCanto3  
6 machine. Analyses were performed using the FlowJo software. The list of antibodies adopted  
7 in the study is provided [Supplementary Table S2](#).

8

### 9 **Apoptosis and Cell Proliferation**

10 To measure apoptosis, surface levels of Annexin V were investigated by flow cytometry.  $1 \times 10^5$   
11 cells were washed and resuspended in 100  $\mu$ l of ice-cold binding buffer (140 mM NaCl, 4 mM  
12 KCl, 0.75 mM MgCl<sub>2</sub> and 10 mM HEPES). 10 min before acquisition, anti-AnnexinV-FITC  
13 antibody (5  $\mu$ l, BD, #51-65874X), 7-AAD (5  $\mu$ l, BD, #559925) and 1.75  $\mu$ l of 85 mM CaCl<sub>2</sub>  
14 were added. Proliferation was determined by labeling T cells with the Tag-IT Violet  
15 Proliferation Cell Tracking Dye (Biolegend, #425101), according to manufacturer instructions.  
16 Briefly, cells were washed twice with PBS, resuspended in PBS ( $100 \times 10^6$  cell/mL) and  
17 incubated with Tag-It Violet Proliferation Cell Tracking Dye (5  $\mu$ M) for 20 min RT in the dark.  
18 Then, an equal volume of FBS was added to the sample, and cells were finally washed with and  
19 10 ml cell culture medium.

20

### 21 **Cell cycle analysis**

22 CD4<sup>+</sup> T cells ( $1 \times 10^6$ ) were washed twice with cold PBS, resuspended in 500  $\mu$ l PBS, fixed by  
23 adding 4.5 ml ice-cold 70% ethanol while vortexing and incubated for at least 2 hours at 4°C.  
24 Samples were centrifuged, washed with PBS for 15 min RT, incubated in 300  $\mu$ l of 1  $\mu$ g/ml  
25 DAPI 0.1% Triton X-100 in PBS for 30 min and acquired in linear mode at low speed.

26

## 1 **RNA-Seq analysis**

2 Illumina strand specific mRNA Roughly 100ng of high-quality total RNA (RIN >8) was used  
3 for the transcriptomic interrogation of control and SIN3A deleted CD4 T cells using Illumina's  
4 Stranded mRNA Prep ligation according to the manufacturer's instructions. Briefly, Oligo(dT)  
5 magnetic beads were used to purify and capture the mRNA molecules in the total RNA. The  
6 purified mRNA was fragmented and copied into first strand complementary DNA (cDNA)  
7 using reverse transcriptase and random primers. A second strand cDNA synthesis step removed  
8 the RNA template while incorporating dUTP in place of dTTP in order to preserve strand  
9 specificity. Next, double-stranded cDNA was A-tailed, then ligated to Illumina anchors bearing  
10 T-overhangs. PCR-amplification of the library allowed the barcoding of the samples with 10bp  
11 dual indexes and the completion of Illumina sequences for cluster generation. Libraries were  
12 quantified with Qubit dsDNA HS Assay Kit and their profile was examined using Agilent's HS  
13 D1000 ScreenTape Assay. Sequencing was carried out in an Illumina NextSeq2000 using  
14 paired end, dual-index sequencing (Rd1: 59 cycles; i7: 10 cycles; i5: 10 cycles, Rd2 59 cycles)  
15 at a depth of 30 million reads per sample.

16 RNA-seq reads are trimmed using Trim Galore v0.4.4 using default parameters to remove the  
17 Nextera adapter sequence. Mapping is performed using STAR (2.6) against the mouse  
18 NCBI37 genome, guided by gene models from Ensembl annotation release 68. Quantification  
19 and generation of gene expression matrices were performed with the function featureCounts,  
20 implemented in the R package Rsubread. Aligned fragments are imported into RStudio and  
21 before statistical analysis, the function filterbyExpr, implemented in the R package edgeR, was  
22 used to determine genes with enough counts for further analyses. Differential gene expression  
23 analysis is performed using the DESeq2 algorithm within R and RStudio. Gene set enrichment  
24 analysis was carried out using GSEA software (<https://www.gsea-msigdb.org/>). The data  
25 discussed in this publication have been deposited in NCBI's Gene Expression Omnibus (Edgar



1 *et al*, 2002) and will be accessible through GEO Series accession number GSE196615  
2 (<https://www.ncbi.nlm.nih.gov/geo/query/acc.cgi?acc=GSE196615>).

3

#### 4 **RT-PCR and Real-time PCR**

5 Total RNA was purified using ReliaPrep RNA Miniprep System (Promega, #Z6011), according  
6 to manufacturer's instructions. RNA was retrotranscribed for 1 hour at 42°C with retro  
7 transcriptase M-MLV (Invitrogen, #28025-013) in the presence of oligo(dT)<sub>15</sub> Primer  
8 (Promega, #C1101), dNTPs (Euroclone), and RNAsin Ribonuclease Inhibitor (Promega, #  
9 N2111). The cDNA was diluted 10 times to perform qRT-PCR with SYBR Green Master Mix  
10 (Applied Biosystems, #4309155). The list of primers adopted in the study is provided in [Suppl](#)  
11 [Table S1](#)). C<sub>t</sub> values were normalized to housekeeping genes expression by the  $\Delta\Delta C_t$  method.

12

#### 13 **Western Blot**

14 Total lysates were recovered in 2% SDS Tris-HCl 65 mmol/L pH 6.8 lysis buffer and sonicated.  
15 Whole cell, cytosolic and nuclear extracts were obtained using the REAP protocol(Suzuki *et al*,  
16 2010). Lysates corresponding to the same number of cells were separated by SDS-PAGE,  
17 transferred to nitrocellulose membrane, blocked with phosphate buffered solution (PBS)-5%  
18 milk, and subjected to immunoblotting. The following antibodies were used: Anti-STAT3 (Cell  
19 Signaling, #9139), anti-(Ser727) STAT3 (Cell Signaling, #9134), anti-  $\beta$ -ACTIN (Cell  
20 Signaling, #3700), anti-SIN3A (Cell Signaling, #7691). Quantification of protein levels was  
21 performed by measuring the mean grey value of the bands using ImageJ.

22

#### 23 **Statistical Analyses**

24 Unless otherwise indicated, a paired two-tailed student's t test was used. P values < 0.05 were  
25 considered significant. Error bars represents standard deviations (SD). GraphPad Prism 9 was  
26 used to perform statistical analyses.

1

## 2 **Logistic model**

3 A logistic model was adopted to assign the distribution of TAM-treated or untreated cells based  
4 on selected markers. The R stats package (version 4.0.2) for logistic model fitting and the R  
5 ggplot2 package (version 3.3.3) were used and run in Rstudio (version 1.0.153).

6

7

8

## 1 **Results**

2

### 3 **CD4-Cre-driven Sin3A inactivation halts proper thymocyte development.**

4 A previous report found that Sin3A deletion in DN thymocytes via Lck-driven Cre expression  
5 hindered CD8 thymocyte development and caused post-thymic accumulation of dysfunctional  
6 CD4<sup>+</sup> T cells (Cowley *et al*, 2005). To better understand the contribution of Sin3A to CD4<sup>+</sup> T  
7 cell development and differentiation, we crossed Sin3A<sup>F/F</sup> with CD4-Cre mice (Sin3A-CD4Δ)  
8 and CD4-CreER<sup>T2</sup> deleter strains, which allows evaluating the impact of Sin3A inactivation  
9 beyond the DN stage of thymocyte development, i.e. over the course of DP to SP transition.  
10 Flow cytometry (FACS) analyses revealed that both CD4SP and CD8SP cells were  
11 significantly underrepresented in Sin3A-CD4Δ mice when compared to controls (Fig 1A-B).  
12 This correlated with Sin3A expression, comparable in DN cells and respectively reduced and  
13 completely lost in DP and SP cells derived from Sin3A-CD4Δ mice compared to controls (Fig  
14 1C). Impaired thymic development also caused a severe reduction in the frequency of CD4<sup>+</sup>  
15 and CD8<sup>+</sup> T cells in secondary lymphoid organs (Fig 1D-E). Of note, remaining CD4<sup>+</sup> T cells  
16 in the spleen of Sin3A-CD4Δ mice had acquired a CD44<sup>high</sup> CD62L<sup>low</sup> effector memory  
17 phenotype (Fig 1F-H). This was likely the results of cells having escaped CD4-Cre-driven  
18 Sin3A deletion (Fig 1H), and having acquired a memory phenotype as a result of lymphopenia  
19 induced proliferation (Sckisel *et al*, 2017). Similar results were obtained when administering  
20 tamoxifen to Sin3A<sup>F/F</sup>CD4-CreER<sup>T2</sup> mice. Tamoxifen administration caused a progressive loss  
21 of circulating mature CD4<sup>+</sup> T cells secondary to a developmental arrest (Supp. Fig. 1). Thus,  
22 conditional deletion of Sin3A at the DP stage unequivocally defines a role for Sin3A in  
23 thymocyte development and underlines the need for post-thymic inactivation for the analysis  
24 in mature T cells.

25

1 **Sin3A deletion in mature CD4 T cells imprints a mTORC1 signature and hinders Th17**  
2 **cell differentiation.**

3 We first investigated Sin3A expression in purified CD4<sup>+</sup> T cells, and found it to be upregulated  
4 by day 3 of anti-CD3/CD28 activation in various skewing condition (Fig. 2A) and over the  
5 course of Th17 differentiation (Fig. 2B). Next, we cultured purified CD4<sup>+</sup> T cells obtained from  
6 CD4-Cre CreER<sup>T2 +/-</sup> Sin3A<sup>F/F</sup> or Rosa26-CreER<sup>T2 +/-</sup> Sin3A<sup>F/F</sup> mice for 6 days in interleukin 7  
7 (IL-7) in the absence or the presence of 4-hydroxytamoxifen (TAM). This was adopted to allow  
8 Cre-mediated Sin3A deletion in mature T cells while avoiding activation (Tan *et al*, 2001). To  
9 investigate the contribution of Sin3A to Th17 differentiation, cells were then cultured for an  
10 additional 3 days in Th17 skewing conditions (refer to Fig. 2C for a schematic experimental  
11 outline). Western blot and FACS analysis verified the loss of Sin3A expression in TAM-treated  
12 cells (Fig. 2D and E). Such effect was more robust and consistent in T cells derived from  
13 Rosa26-CreER<sup>T2 +/-</sup> Sin3A<sup>F/F</sup> mice (not shown), which were then adopted for all further studies.  
14 Over the course of Th17 skewing, both control and TAM-treated cells completed several rounds  
15 of cell division, indicated by the dilution of the CFSE vital dye (Fig 3A-B). Fewer TAM-treated  
16 cells completed more than 3 cell division cycles (Fig. 3B). This was paralleled by lower cellular  
17 yields (Fig 3C), and a slightly increase in apoptotic cells (Supp. Fig 2A-B), and in cells in the  
18 S phase of the cell cycle (Supp. Fig 2C). To some extent, this recapitulates the phenotype of  
19 mouse embryonic fibroblasts, embryonic stem cells (Fazzio *et al*, 2008) and pluripotent cells  
20 (Dannenber *et al*, 2005).

21 In spite of the mild proliferative defect, Sin3A deficient cells acquired a typical memory  
22 phenotype in response to Th17 skewing conditions. Indeed, while IL-7-cultured CD4<sup>+</sup> T cells  
23 retained a CD44<sup>low</sup>, CD62L<sup>high</sup> naïve phenotype, and lacked expression of activation markers  
24 such as CD25, PD-1 or CD69 (Supp. Fig 3A), most of Sin3A sufficient and deficient Th17-  
25 skewed T cells acquired a CD44<sup>high</sup>, CD62L<sup>low</sup> effector memory phenotype (Fig 3E), and  
26 upregulated CD69, CD25, PD-1 (Supp Fig 3B-C).

1 To investigate T cell behavior in response to a nominal antigen, we generated ovalbumin-  
2 specific TCR transgenic OTII<sup>+/-</sup> Sin3A<sup>F/F</sup> CreERT2<sup>+/-</sup> mice. CD4 T cells purified from these  
3 mice were then compared to those derived from OTII<sup>+/-</sup> Sin3A<sup>+F</sup> CreERT2<sup>+/-</sup> littermates to also  
4 control for Cre-mediated toxicity (Loonstra A, Vooijs M, Beverloo HB, Al Allak B, van Drunen  
5 E, Kanaar R, Berns A, 2001). CD4 T cells were purified and treated or not with TAM, labeled  
6 with CFSE and then stimulated with ovalbumin. Data depicted in [Supp. Fig 4A-B](#) indicate that  
7 antigen stimulation induced proliferation of both Sin3A sufficient and deficient cells. Again,  
8 although OTII cells lacking Sin3A (OTII<sup>+/-</sup> Sin3A<sup>+F</sup> CreERT2<sup>+/-</sup>) revealed a mild proliferative  
9 and survival defect compared to controls, they similarly acquired a CD44<sup>high</sup>, CD25<sup>high</sup>  
10 phenotype ([Supp. Fig. 4C](#)). Thus, together these data indicate that deletion of Sin3A in mature  
11 T cells is compatible with TCR-driven proliferation and differentiation into memory cells.

12 To obtain an unbiased overview of the impact of Sin3A inactivation on Th17 differentiation,  
13 we next performed RNA-seq analysis ([Fig 3F-H](#)). To this aim, highly purified CD4<sup>+</sup> T cells  
14 were kept for 6 days in IL-7 without or with TAM (Basal or BasalTAM), and then cultured for  
15 3 additional days in Th17 polarizing conditions (Day3 or Day3TAM) ([Fig 3F-H](#)). RNA was  
16 then isolated and sequenced for transcripts differential expression. Most of the transcript  
17 variation segregated CD4<sup>+</sup> T cells by the Th17 polarizing conditions. First principal  
18 components (PC1) analyses accounted for 90% of the variance between Th17 polarized T cells  
19 and unstimulated cells (basal conditions), and clearly differentiated Day3 samples (Sin3A  
20 sufficient) from Day3TAM ones (Sin3A deficient) ([Fig. 3 F](#)). Comparison between Day3TAM  
21 and Day3 T cells yielded a total of 9386 differentially expressed genes (p<0.05). Among them,  
22 1139 genes were upregulated and 2282 were downregulated in Day3TAM T cells compared to  
23 controls (p<0.05), when considering genes with a fold change >1, as represented in the Volcano  
24 plot ([Fig. 3G](#)). Gene set enrichment analysis (GSEA) was next performed comparing  
25 Day3TAM and Day3 samples. We found a significant enrichment of genes implicated in  
26 mTORC1 signaling pathway (Genes up-regulated through activation of mTORC1 complex)

1 (Fig. 3 H, Nominal p Value < 0.001, FDR q-value: 0.147). The finding that Sin3A inactivation  
2 imprints memory T cells with an active mTORC1 signaling signature, is strongly suggestive of  
3 a role of Sin3A in Th17 differentiation, given the notion that mTORC1 controls STAT3  
4 phosphorylation, and Th17 differentiation.

5 Thus, we next investigated the expression of IL-17A, the signature cytokine for Th17 cells. We  
6 found that while a fraction of control cells expressed IL-17A after PMA and Ionomycin  
7 stimulation (PI), TAM-treated Sin3A-deficient cells mostly failed to do so (Fig. 4A). At  
8 difference, cells produced IFN $\gamma$  to comparable extents (Fig. 4B). Defective IL-17A could not  
9 be attributed to differences in proliferation, as it was observed among Sin3A sufficient and  
10 deficient cells having undergone similar rounds of cell division (Suppl. Fig.5A-C). Of note, a  
11 fraction of Sin3A deficient cells preserved IL-17A expression (Suppl. Fig.5B).

12 RT-PCR analysis pointed towards a transcriptional defect, as Sin3A $\Delta$  cells revealed lower *Il17a*  
13 RNA levels compared to controls (Fig 4C), while *Ifng* levels were similar (Fig 4C-D). In  
14 addition to *Il17a*, also the expression of *Il17f*, *Il23r* and *Il22* were lower in Sin3A deleted cells,  
15 while *Il21* was significantly increased when compared to controls (Fig. 4D). Thus, post-thymic  
16 genetic inactivation of Sin3A hinders proper differentiation of Th17 cells.

17

18 **STAT3 and Foxp3 upregulation reflect defective *Il17a* expression in ROR $\gamma$ <sup>t</sup> Sin3A-**  
19 **deficient CD4<sup>+</sup> T cells.**

20 Differentiation of Th17 helper cells depends on signals from IL-6, in combination with TGF- $\beta$ ,  
21 IL-23 and IL-21. These signals lead to the activation of STAT3 and the expression of ROR $\gamma$ <sup>t</sup>,  
22 the Th17 lineage defining transcription factor. ROR $\gamma$ <sup>t</sup> then acts in synergy with STAT3 (Ciofani  
23 *et al*, 2012), to promote the production of IL-17A, IL-17F, and IL-22 (Ivanov *et al*, 2006; Zhou  
24 *et al*, 2007; Manel *et al*, 2008) (Fig 5A).

25 As Sin3A controls STAT3 transcriptional activity in several cell types (Icardi *et al*, 2012;  
26 Gambi *et al*, 2019), we first investigated relative STAT3 expression, phosphorylation and

1 nuclear representation. We found a trend towards increased levels of total STAT3 and of its  
2 phosphorylation on Ser727 in cells lacking Sin3A compared to controls (Fig 5B, D). In addition,  
3 nuclear STAT3 levels were significantly higher in Sin3A-deficient cells compared to controls  
4 (Fig 5C, E). This is in line with the transcriptomic data suggesting an upregulation of mTORC1  
5 (Fig. 3) which is upstream of STAT3, and suggest that STAT3 might be more transcriptionally  
6 active in cells lacking Sin3A, which is corroborated by higher *Il21* levels (Fig. 4D).

7 Next, we analyzed ROR $\gamma$ t regulation. Data indicated ROR $\gamma$ t to be expressed at comparable  
8 levels in Th17 skewed Sin3A sufficient and deficient cells both at the protein (Fig 5F-H) and  
9 mRNA level (Fig. 5I). Thus, cells lacking Sin3A preserve expression of STAT3 and ROR $\gamma$ t.  
10 However, while *Il21*, which mainly relies on STAT3 (Wei *et al*, 2007) was expressed at higher  
11 levels in cells lacking Sin3A (Fig. 4D), *Il17a*, *Il23r*, and *Il22*, which are concomitantly  
12 regulated by STAT3 and ROR $\gamma$ t (Ivanov *et al*, 2006; Durant *et al*, 2011; Ciofani *et al*, 2012),  
13 failed to be properly induced. These data support the notion that STAT3 and not ROR $\gamma$ t reveal  
14 transcriptional active in Th17 cells lacking Sin3A.

15 STAT3 also controls Foxp3 expression (Pallandre *et al*, 2007). In turns, Foxp3 can directly  
16 interact with ROR $\gamma$ t, and inhibit *Il17a* transcription (Ichiyama *et al*, 2008; Zhou *et al*, 2008).  
17 We thus asked whether the absence of Sin3A, could favor the expression of Foxp3 in spite of  
18 Th17 skewing conditions, and this might account for defective of *il17a* upregulation. Data  
19 reported in Figure 6 indicate that cells lacking Sin3A were indeed enriched for Foxp3<sup>+</sup> cells  
20 (Fig 6A-B), likely due to increased *Foxp3* mRNA levels (Fig. 6C). Of note, when analyzing  
21 individual cells, Foxp3 and IL-17A proteins were mutually exclusive (Fig. 6A), supporting the  
22 possibility that gained Foxp3 expression could be causally linked to inhibition of *Il17a*, and the  
23 absence of IL-17A.

24 We thus asked whether interfering with FoxP3 activity would rescue IL-17A expression. To  
25 this aim, we took advantage of P60, a cell permeable 15-mer synthetic peptide reported to bind  
26 to Foxp3 and to prevent its nuclear translocation (Casares *et al*, 2010). Sin3A sufficient and

1 deficient cells were cultured in Th17 skewing conditions in the absence or the presence of P60,  
2 and then analyzed for IL-17A expression. We found that adding the P60 inhibitor over the  
3 course of Th17 differentiation significantly increased the percentage of IL-17A<sup>+</sup> cells (Fig. 6D),  
4 with no effects on cell viability (Supplementary Fig. 6A). Although this was the case for both  
5 Sin3A sufficient and deficient cells, the rescue was more statistically relevant in the latter. Thus,  
6 gained Foxp3 expression in cells lacking Sin3A contributes at least in part, to reduced IL-17A  
7 levels.

8

9 **Sin3A deletion favors IL-2 expression, which is causally linked to Foxp3 upregulation and**  
10 **IL-17A inhibition.**

11 IL-2 promotes mTORC1 signaling (Ray *et al*, 2015), STAT3 and STAT5 phosphorylation and  
12 activation and Foxp3 expression and stability (Chen *et al*, 2011; Setoguchi *et al*, 2005; Zorn *et*  
13 *al*, 2006). As Sin3A was previously reported to negatively regulate *Il2* transcription by bringing  
14 HDAC to its promoter (Lam *et al*, 2015), we reasoned that the loss of Sin3A could unleash  
15 increased IL-2 expression, and this could contribute to the upregulation of FoxP3 and defective  
16 *Il17a* expression. By FACS analysis, we found that Sin3A deficient cultures were indeed  
17 enriched in IL-2 producing cells (Fig 7A), which was corroborated by higher *Il2* mRNA levels  
18 (Fig 7C), and a rise in phosphorylated STAT5, and p70S6 kinase (Suppl. Fig. 7). These data  
19 provide a mechanistic explanation for the finding that Sin3A-deficient cells were characterized  
20 by the mTORC1 signaling signature. Thus, Sin3A inactivation unleash *Il2* transcription in Th17  
21 conditions, and this might cause *il17a*/IL-17A inhibition

22 To directly challenge the role of IL-2, we investigated whether neutralizing IL-2 during Th17  
23 skewing would impact on relative expression of FoxP3 and IL-17A. FACS analyses indicated  
24 that the addition of anti-IL-2 neutralizing antibodies had minimal effects on Sin3A sufficient  
25 cultures, while it lowered the frequency of Foxp3<sup>+</sup> cells almost to significant levels in Sin3A  
26 deficient cultures. Concomitantly, neutralizing IL-2 increased the frequency of IL-17A<sup>+</sup> cells



1 only in cells lacking Sin3A, while had no effects on Sin3A sufficient controls (Fig 7D-E).  
2 Notably, the rescue in IL-17A<sup>+</sup> cells was proportional to the dose of anti-IL-2 Ab (Fig 7F),  
3 independent of cell viability (Supplementary Fig. 6B), and inversely correlated with the  
4 frequency of IL-2<sup>+</sup> cells (Fig 7G). Thus, inactivation of Sin3A favors IL-2 upregulation, and  
5 this appears causally linked to the upregulation of Foxp3 and the inhibition of IL-17A.  
6 To better understand the relationship of IL-2, IL-17 and Foxp3, a logistic model was adopted  
7 for the unsupervised classification of samples based on their relative expression of these  
8 molecules. The scatter plots depicted in Fig. 8A indicate that samples were assigned to  
9 independent categories (TAM-treated and untreated) with 95% confidence only when IL-2 vs  
10 IL-17A or Foxp3 vs IL-17A were considered. Instead, when IL-2 and FOXP3 were analyzed  
11 Sin3A sufficient (untreated) and deficient (TAM treated) clustered together. Thus, together  
12 these data indicate that IL-2 producing cells are more likely to express Foxp3 rather than IL-  
13 17A. Taken together our data support a model (schematically depicted in Fig 8B) by which  
14 Sin3A normally keeps IL-2 in check over the course of Th17 differentiation balancing  
15 mTORC1, STAT3 and possibly STAT5 signaling ultimately controlling ROR $\gamma$ t and FoxP3.

## 1 **Discussion**

2 The transcriptional regulator Sin3A controls several pathways governing many aspects of  
3 normal and neoplastic growth and survival. Here we uncovered its critical role in CD4<sup>+</sup> T cell  
4 progenitors, and over the course of Th17 differentiation.

5 In a previous study, Cowley *et al.* reported that Lck-Cre-driven deletion of Sin3A at the DN  
6 stage resulted in the arrest of CD8 thymocyte development, and only allowed the maturation of  
7 dysfunctional CD4SP cells(Cowley *et al.*, 2005). By adopting CD4-Cre and CD4-CreER<sup>T2</sup>  
8 deleter strains, we report that inactivation of Sin3A at the DP stage severely halted both CD4<sup>+</sup>  
9 and CD8<sup>+</sup> thymocyte maturation, causing peripheral T cell lymphopenia. Remaining CD4 T  
10 cells found in secondary lymphoid organs were found to have escaped Sin3A deletion. Thus,  
11 deletion of Sin3A at the DP stage is not compatible with further CD4 T cell development.

12 The reasons accounting for the different impact of Sin3A deletion, i.e., at the DN (Cowley *et*  
13 *al.*, 2005) or DP (shown here), according to the timing remain to be fully clarified. However, it  
14 should be noted that while DN thymocytes undergo a rapid and extensive proliferative phase  
15 (6-8 cell cycle division) to ensure the generation of a large pool of progenitors, DP cells enter  
16 a resting phase to allow rearrangement of the TCR alpha chain (Taghon *et al.*, 2006; Ciofani &  
17 Zúñiga-Pflücker, 2007). Indeed, by performing single cell RNA-seq analyses Li *et al.* found  
18 that up to 40% of intermediate SP were in the M/G1 phase, while this was not the case for DP  
19 blasts (Li *et al.*, 2021). Thus, it could be speculated that deletion of Sin3A at the DN stage  
20 (Cowley *et al.*, 2005) results in the selection of a cell subset capable to survive positive thymic  
21 selection, and yet lacking proper responsiveness at the mature stage. In contrast, inactivation of  
22 Sin3A at the DP stage, beyond TCR rearrangement, might render developing precursors more  
23 sensitive to negative selection. This is supported by the finding that Sin3A deficient thymocytes  
24 were enriched for apoptotic cells. A role for ROR $\gamma$ t might also be envisaged. Indeed, it normally  
25 enforces a resting state in developing thymocytes, and favors their survival via Bcl-XL  
26 upregulation (Sun *et al.*, 2000). Given the finding that in the absence of Sin3A ROR $\gamma$ t target

1 genes are not properly induced, whether ROR $\gamma$ t in Sin3A deficient thymocytes retains  
2 functionality needs to be verified.

3 To overcome the developmental arrest and analyze the role of Sin3A in mature T cells we  
4 adopted TAM-induced deletion. We found that post-thymic Sin3A inactivation was compatible  
5 with cell proliferation and their differentiation into memory cells. Although a slight enrichment  
6 of apoptotic cells and of cells arrested in the S-phase in cultures was detected within Sin3A-  
7 deficient cells, previously reported in other model systems by us and others (Dannenberg *et al*,  
8 2005; McDonel *et al*, 2012; Gambi *et al*, 2019), Sin3A sufficient and deficient (TAM-treated)  
9 cells completed comparable rounds of cell division and acquired several memory markers. By  
10 day 3, Sin3A knock down cells also revealed a distinct mTORC1 signaling signature,  
11 corroborated by higher CD25 and PD-1 surface levels, and increased phosphorylation of  
12 p70S6K, an mTORC1 effector molecule (Brunn *et al*, 1996). Nevertheless, in Th17 skewing  
13 conditions, Sin3A deficient cells failed to produce IL-17A because of *Il17a* defective  
14 expression. Compared to controls, Sin3A deficient T cells also failed to upregulate *Il17f*, *Il23*  
15 and *Il22*, typical determinants of Th17 cell differentiation, and instead upregulated *Il21* to  
16 higher extents when compared to controls. As *Il21* is more dependent on STAT3 (Wei *et al*,  
17 2007), while *Il17a*, *Il23R* and *Il22* require ROR $\gamma$ t (Zhou *et al*, 2007), the gene expression profile  
18 of Sin3A deficient cells was consistent with the cells having STAT3 (increased phosphorylation  
19 and nuclear representation), but ROR $\gamma$ t transcriptionally active.

20 Our data support the possibility that ROR $\gamma$ t malfunctioning was related to the acquisition of  
21 Foxp3. Indeed, we found Sin3A deficient cells to express either Foxp3 or IL-17A by a mutually  
22 exclusive modality, suggesting the existence of a causative link. In line with this possibility, we  
23 found that the Foxp3 P60 inhibitor, able to bind to Foxp3 and inhibit its nuclear translocation  
24 and activity (Casares *et al*, 2010), increased the percentage of IL-17A-expressing cells most  
25 significantly in Sin3A deficient cells. Previously published studies support our findings. Zhou  
26 and co-authors (Zhou *et al*, 2008) had found that TGF $\beta$ -induced Foxp3 could inhibit ROR $\gamma$ t

1 through a direct interaction, also involving Foxp3 DNA binding domain (Zhou *et al*, 2008). In  
2 their study these authors reported that ROR $\gamma$ t and Foxp3 were co-expressed in naive CD4<sup>+</sup> T  
3 cells exposed to TGF- $\beta$ , and that IL-6, IL-21 and IL-23 were sufficient to relieve Foxp3-  
4 mediated inhibition of ROR $\gamma$ t, thereby promoting Th17 cell differentiation.

5 Foxp3 expression in human and mouse T cells is induced by STAT3 activation downstream to  
6 CD3/CD28 and TGF $\beta$  (Pallandre *et al*, 2007). Also, IL-2 promotes Foxp3 expression by  
7 increasing its stability (Chen *et al*, 2011). We found that Sin3A deficient T cells expressed  
8 higher levels of IL-2, and that neutralizing anti-IL-2 antibodies limited Foxp3 upregulation and  
9 partially rescued IL-17A expression in Sin3A deficient cells. Lam *et al*. previously found that  
10 Sin3A represses IL-2 gene expression by bringing histone deacetylase activity to the IL-2  
11 promoter. Data indicated that TCR-induced Cdk5-dependent Sin3A phosphorylation and  
12 destabilization, reduces Sin3A/HDAC binding to the IL-2 promoter, allowing higher IL-2  
13 expression (Lam *et al*, 2015). Our data are consistent with this previous report, and with the  
14 possibility that Sin3A negatively regulates IL-2 expression in Th17 conditions to restrain Foxp3  
15 induction and enable ROR $\gamma$ t activity.

16 Other mechanisms might further contribute to the observed phenotype. Indeed, blocking Foxp3  
17 or neutralizing IL-2 only partially rescued IL-17-producing cells. For instance, Sin3A through  
18 the binding to p300 and HDAC1 (Tsai *et al*, 2017; Kadamb *et al*, 2013; Dancy & Cole, 2015)  
19 might control ROR $\gamma$ t (Wu *et al*, 2015) and/or Foxp3 (Liu *et al*, 2013, 2014; Xiao *et al*, 2014)  
20 acetylation, and by that their activities. In addition, a number of transcription factors fine tune  
21 Th17 differentiation (Tanaka *et al*, 2014; Ciofani *et al*, 2012; Zhang *et al*, 2008; Yang *et al*,  
22 2007b). We found that STAT5 phosphorylation was increased in cells lacking Sin3A. Given its  
23 ability to favor Foxp3 expression (Burchill *et al*, 2007) and to inhibit Th17 cell differentiation  
24 (Laurence *et al*, 2007), also STAT5 could contribute to the loss of IL-17A<sup>+</sup> cells and the  
25 appearance of the Foxp3<sup>+</sup> ones. We are in the process of further interrogating the RNA-seq data  
26 to uncover whether additional mechanisms are indeed contributing to the phenotype.

1 To investigate the effect of Sin3A inactivation *in vivo*, we attempted the transfer of finite  
2 number of T cells in syngenic recipients and treated them with TAM. Sin3A deletion was  
3 observed, and yet cells failed to persist (not shown). So, whether events similar to those  
4 described here shape Th17 cell function *in vivo* remains to be determined. Nevertheless a subset  
5 of T cells within the small intestinal lamina propria was found to co-express both Foxp3 and  
6 ROR $\gamma$ t and to produce less IL-17 than those that express ROR $\gamma$ t alone (Zhou *et al*, 2008),  
7 suggesting that Th17 cells can acquire distinct physiological functions in response to  
8 extracellular signals (cytokines/growth factors). We suggest that Sin3A contributes to such  
9 differentiation program, by tuning IL-2 and mTORC1 and ultimately Foxp3. Although some  
10 controversy regarding the role of mTORC1 signaling on Foxp3 expression exists (Battaglia *et*  
11 *al*, 2005; Heather Kopf, Gonzalo M. de la Rosa, O.M.Zack Howard, 2007), it has been shown  
12 to regulate the generation and function of central and effector Foxp3<sup>+</sup> regulatory T cells (Sun  
13 *et al*, 2018). It is thus tempting to suggest that IL-2 and/or agents directly tuning mTORC1 (i.e.,  
14 nutrients, microbial components) (McGeachy & McSorley, 2012) might shape the  
15 inflammatory/regulatory phenotype of Th17 cells. As Sin3A inhibitors have been developed  
16 for *in vivo* use, these data raise the possibility to attempt the inhibition of Sin3A (Kwon *et al*,  
17 2015) in autoimmune diseases or gut inflammatory disorders. In these conditions, Sin3A  
18 inhibition could dampen the pro-inflammatory nature of Th17 cells, while favoring  
19 immunoregulatory functions.

## 1 **Acknowledgements**

2 The authors acknowledge funding from Associazione Italiana sulla Ricerca sul Cancro (AIRC:  
3 IG 2018 Id.21763), and from a generous anonymous donor. The authors are grateful to Dr. Jan  
4 Tavernier (Ghent University) for the provision of Sin3A<sup>F/F</sup> mice, Dr. Paolo Dellabona (San  
5 Raffaele Institute) for the provision of CD4-Cre mice, and Dr. Marco Bianchi (San Raffaele  
6 Institute) for the provision of Rosa26-ER<sup>T2</sup>Cre mice. Finally, the authors would like to thank  
7 Dr. Maya Fedeli (San Raffaele Institute) for help with thymic analysis and for anti-IL-2  
8 antibodies, Dr. Christopher Bruhn (FIRC Institute of Molecular Oncology, IFOM, Milan, Italy)  
9 for help with the logistic models and present and past members of the Mondino's lab for  
10 frequent discussion.

11

## 12 **Author contributions**

13 LP performed experiments, analyzed data and prepared the manuscript; LI initiated the project,  
14 performed proof of concept experiments and backcrossed mice; EDS and VB performed  
15 experiments; AA and FPC performed RNA seq; TL and JJJ analyzed RNA seq data, provided  
16 the p60 inhibitor and critical suggestions; AM supervised activities and contributed to  
17 experimental design, data analyses and interpretation and manuscript preparation.

18

## 19 **Conflict of interest**

20 The authors declare no competing interests

21

22

## 1 **References**

- 2 Alland A, Muhle R, Hou Jr H, Potes J, Chin L, Schreiber-Angus N DR (1997) Role for N-  
3 CoR and histone deacetylase in Sin3-mediated transcriptional repression. *Nature* 387:  
4 49–55
- 5 Ayer DE, Lawrence QA & Eisenman RN (1995) Mad-max transcriptional repression is  
6 mediated by ternary complex formation with mammalian homologs of yeast repressor  
7 Sin3. *Cell* 80: 767–776
- 8 Battaglia M, Stabilini A & Roncarolo MG (2005) Rapamycin selectively expands  
9 CD4+CD25+FoxP3 + regulatory T cells. *Blood* 105: 4743–4748
- 10 Brunn GJ, Williams J, Sabers C, Wiederrecht G, Lawrence JC & Abraham RT (1996) Direct  
11 inhibition of the signaling functions of the mammalian target of rapamycin by the  
12 phosphoinositide 3-kinase inhibitors, wortmannin and LY294002. *EMBO J* 15: 5256–  
13 5267
- 14 Burchill MA, Yang J, Vogtenhuber C, Blazar BR & Farrar MA (2007) IL-2 Receptor  $\beta$ -  
15 Dependent STAT5 Activation Is Required for the Development of Foxp3 + Regulatory T  
16 Cells . *J Immunol* 178: 280–290
- 17 Casares N, Rudilla F, Arribillaga L, Llopiz D, Riezu-Boj JI, Lozano T, López-Sagaseta J,  
18 Guembe L, Sarobe P, Prieto J, *et al* (2010) A Peptide Inhibitor of FOXP3 Impairs  
19 Regulatory T Cell Activity and Improves Vaccine Efficacy in Mice. *J Immunol* 185:  
20 5150–5159
- 21 Chaubal A & Pile LA (2018) Same agent, different messages: Insight into transcriptional  
22 regulation by SIN3 isoforms. *Epigenetics and Chromatin* 11: 1–11
- 23 Chen Q, Kim YC, Laurence A, Punkosdy GA & Shevach EM (2011) IL-2 Controls the  
24 Stability of Foxp3 Expression in TGF- $\beta$ -Induced Foxp3 + T Cells In Vivo . *J Immunol*  
25 186: 6329–6337
- 26 Ciofani M, Madar A, Galan C, Sellars M, MacE K, Pauli F, Agarwal A, Huang W, Parkurst

- 1 CN, Muratet M, *et al* (2012) A validated regulatory network for Th17 cell specification.  
2 *Cell* 151: 289–303
- 3 Ciofani M & Zúñiga-Pflücker JC (2007) The thymus as an inductive site for T lymphopoiesis.  
4 *Annu Rev Cell Dev Biol* 23: 463–493
- 5 Cowley SM, Iritani BM, Mendrysa SM, Xu T, Cheng PF, Yada J, Liggitt HD & Eisenman  
6 RN (2005) The mSin3A Chromatin-Modifying Complex Is Essential for Embryogenesis  
7 and T-Cell Development. *Mol Cell Biol* 25: 6990–7004
- 8 Dancy BM & Cole PA (2015) Protein lysine acetylation by p300/CBP. *Chem Rev* 115: 2419–  
9 2452
- 10 Dannenberg J, David G, Zhong S, Torre J Van Der, Wong WH & Depinho RA (2005)  
11 mSin3A corepressor regulates diverse transcriptional networks governing normal and  
12 neoplastic growth and survival. *Genes Dev* 19: 1581–1595
- 13 Das J, Ren G, Zhang L, Roberts AI, Zhao X, Bothwell ALM, Van Kaer L, Shi Y & Das G  
14 (2009) Transforming growth factor  $\beta$  is dispensable for the molecular orchestration of  
15 Th17 cell differentiation. *J Exp Med* 206: 2407–2416
- 16 Dong C (2008) TH17 cells in development: An updated view of their molecular identity and  
17 genetic programming. *Nat Rev Immunol* 8: 337–348
- 18 Durant L, Watford WT, Ramos HL, Laurence A, Vahedi G, Takahashi H, Sun H, Kanno Y,  
19 Powrie F & Shea JJO (2011) Diverse Targets of the Transcription Factor STAT3  
20 Contribute to T Cell Pathogenicity and Homeostasis. *Immunity* 32: 605–615
- 21 Edgar R, Domrachev M & Lash AE (2002) Gene Expression Omnibus: NCBI gene  
22 expression and hybridization array data repository. *Nucleic Acids Res* 30: 207–210
- 23 Fazio TG, Huff JT & Panning B (2008) An RNAi Screen of Chromatin Proteins Identifies  
24 Tip60-p400 as a Regulator of Embryonic Stem Cell Identity. *Cell* 134: 162–174
- 25 Gambi G, Di Simone E, Basso V, Ricci L, Wang R, Verma A, Elemento O, Ponzoni M,  
26 Inghirami G, Icardi L, *et al* (2019) The transcriptional regulator Sin3A contributes to the



- 1 oncogenic potential of STAT3. *Cancer Res* 79: 3076–3087
- 2 Heather Kopf, Gonzalo M. de la Rosa, O.M.Zack Howard and XC (2007) Rapamycin  
3 inhibits differentiation of Th17 cells and promotes generation of FoxP3+ T regulatory  
4 cells. *Int Immunopharmacol* 7: 1819–1824
- 5 Heideman MR, Lancini C, Proost N, Yanover E, Jacobs H & Dannenberg JH (2014) Sin3a-  
6 associated Hdac1 and Hdac2 are essential for hematopoietic stem cell homeostasis and  
7 contribute differentially to hematopoiesis. *Haematologica* 99: 1292–1303
- 8 Icardi L, Mori R, Gesellchen V, Eyckerman S, De Cauwer L, Verhelst J, Vercauteren K,  
9 Saelens X, Meuleman P, Leroux-Roels G, *et al* (2012) The Sin3a repressor complex is a  
10 master regulator of STAT transcriptional activity. *Proc Natl Acad Sci U S A* 109: 12058–  
11 12063
- 12 Ichiyama K, Yoshida H, Wakabayashi Y, Chinen T, Saeki K, Nakaya M, Takaesu G, Hori S,  
13 Yoshimura A & Kobayashi T (2008) Foxp3 inhibits ROR $\gamma$ t-mediated IL-17A mRNA  
14 transcription through direct interaction with ROR $\gamma$ t. *J Biol Chem* 283: 17003–17008
- 15 Ivanov II, McKenzie BS, Zhou L, Tadokoro CE, Lepelley A, Lafaille JJ, Cua DJ & Littman  
16 DR (2006) The Orphan Nuclear Receptor ROR $\gamma$ t Directs the Differentiation Program of  
17 Proinflammatory IL-17+ T Helper Cells. *Cell* 126: 1121–1133
- 18 Jiang Y, Wang X & Dong C (2019) Molecular mechanisms of T helper 17 cell differentiation:  
19 Emerging roles for transcription cofactors 1st ed. Elsevier Inc.
- 20 Kadamb R, Mittal S, Bansal N, Batra H & Saluja D (2013) Sin3: Insight into its transcription  
21 regulatory functions. *Eur J Cell Biol* 92: 237–246
- 22 Korn T, Bettelli E, Gao W, Awasthi A, Jäger A, Strom TB, Oukka M & Kuchroo VK (2007)  
23 IL-21 initiates an alternative pathway to induce proinflammatory T H17 cells. *Nature*  
24 448: 484–487
- 25 Korn T, Bettelli E, Oukka M & Kuchroo VK (2009) IL-17 and Th17 cells. *Annu Rev Immunol*  
26 27: 485–517

- 1 Kwon Y-J, Petrie K, Leibovitch BA, Zeng L, Mezei M, Howell L, Gil V, Christova R, Bansal  
2 N, Yang S, *et al* (2015) Selective inhibition of SIN3 corepressor with avermectins as a  
3 novel therapeutic strategy in triple negative breast cancer. *Mol Cancer Ther* 14: 1824–  
4 1836
- 5 Laherty CD, Yang WM, Jian-Min S, Davie JR, Seto E & Eisenman RN (1997) Histone  
6 deacetylases associated with the mSin3 corepressor mediate Mad transcriptional  
7 repression. *Cell* 89: 349–356
- 8 Lam E, Pareek TK & Letterio JJ (2015) Cdk5 controls IL-2 gene expression via repression of  
9 the mSin3a-HDAC complex. *Cell Cycle* 14: 1327–1336
- 10 Laurence A, Tato CM, Davidson TS, Kanno Y, Chen Z, Yao Z, Blank RBB, Meylan F, Siegel  
11 R, Hennighausen L, *et al* (2007) Interleukin-2 Signaling via STAT5 Constrains T Helper  
12 17 Cell Generation. *Immunity* 26: 371–381
- 13 Lee PP, Fitzpatrick DR, Beard C, Jessup HK, Lehar S, Makar KW, Pérez-Melgosa M,  
14 Sweetser MT, Schlissel MS, Nguyen S, *et al* (2001) A critical role for Dnmt1 and DNA  
15 methylation in T cell development, function, and survival. *Immunity* 15: 763–774
- 16 Li Y, Li K, Zhu L, Li B, Zong D, Cai P, Jiang C, Du P, Lin J & Qu K (2021) Development of  
17 double-positive thymocytes at single-cell resolution. *Genome Med* 13: 1–18
- 18 Liang SC, Tan XY, Luxenberg DP, Karim R, Dunussi-Joannopoulos K, Collins M & Fouser  
19 LA (2006) Interleukin (IL)-22 and IL-17 are coexpressed by Th17 cells and  
20 cooperatively enhance expression of antimicrobial peptides. *J Exp Med* 203: 2271–2279
- 21 Liu Y, Wang L, Han R, Beier UH, Akimova T, Bhatti T, Xiao H, Cole PA, Brindle PK &  
22 Hancock WW (2014) Two Histone/Protein Acetyltransferases, CBP and p300, Are  
23 Indispensable for Foxp3+ T-Regulatory Cell Development and Function. *Mol Cell Biol*  
24 34: 3993–4007
- 25 Liu Y, Wang L, Predina J, Han R, Beier UH, Wang LCS, Kapoor V, Bhatti TR, Akimova T,  
26 Singhal S, *et al* (2013) Inhibition of p300 impairs Foxp3+ T regulatory cell function and

- 1 promotes antitumor immunity. *Nat Med* 19: 1173–1177
- 2 Loonstra A, Vooijs M, Beverloo HB, Al Allak B, van Drunen E, Kanaar R, Berns A and JJ  
3 (2001) Growth inhibition and DNA damage induced by Cre recombinase in mammalian  
4 cells. *Proc Natl Acad Sci U S A* 98: 9209–9214
- 5 Manel N, Unutmaz D & Littman DR (2008) The differentiation of human TH-17 cells  
6 requires transforming growth factor- $\beta$  and induction of the nuclear receptor ROR $\gamma$ t. *Nat*  
7 *Immunol* 9: 641–649
- 8 Mathur AN, Chang H-C, Zisoulis DG, Stritesky GL, Yu Q, O’Malley JT, Kapur R, Levy DE,  
9 Kansas GS & Kaplan MH (2007) Stat3 and Stat4 Direct Development of IL-17-Secreting  
10 Th Cells. *J Immunol* 178: 4901–4907
- 11 McDonel P, Demmers J, Tan DWM, Watt F & Hendrich BD (2012) Sin3a is essential for the  
12 genome integrity and viability of pluripotent cells. *Dev Biol* 363: 62–73
- 13 McGeachy MJ & McSorley SJ (2012) Microbial-Induced Th17: Superhero or Supervillain? *J*  
14 *Immunol* 189: 3285–3291
- 15 Nagy L, Kao HY, Chakravarti D, Lin RJ, Hassig CA, Ayer DE, Schreiber SL & Evans RM  
16 (1997) Nuclear receptor repression mediated by a complex containing SMRT, mSin3A,  
17 and histone deacetylase. *Cell* 89: 373–380
- 18 Nakamura T, Mori T, Tada S, Krajewski W, Rozovskaia T, Wassell R, Dubois G, Mazo A,  
19 Croce CM & Canaani E (2002) ALL-1 is a histone methyltransferase that assembles a  
20 supercomplex of proteins involved in transcriptional regulation. *Mol Cell* 10: 1119–1128
- 21 Pal S, Yun R, Datta A, Lacomis L, Erdjument-Bromage H, Kumar J, Tempst P & Sif S (2003)  
22 mSin3A/Histone Deacetylase 2- and PRMT5-Containing Brg1 Complex Is Involved in  
23 Transcriptional Repression of the Myc Target Gene *cad*. *Mol Cell Biol* 23: 7475–7487
- 24 Pallandre J-R, Brillard E, Créhange G, Radlovic A, Remy-Martin J-P, Saas P, Rohrlich P-S,  
25 Pivot X, Ling X, Tiberghien P, *et al* (2007) Role of STAT3 in CD4 + CD25 + FOXP3 +  
26 Regulatory Lymphocyte Generation: Implications in Graft-versus-Host Disease and

- 1 Antitumor Immunity . *J Immunol* 179: 7593–7604
- 2 Ray JP, Staron MM, Shyer JA, Ho PC, Marshall HD, Gray SM, Laidlaw BJ, Araki K, Ahmed  
3 R, Kaech SM, *et al* (2015) The Interleukin-2-mTORc1 Kinase Axis Defines the  
4 Signaling, Differentiation, and Metabolism of T Helper 1 and Follicular B Helper T  
5 Cells. *Immunity* 43: 690–702
- 6 Rincon M & Pereira FV (2018) A new perspective: Mitochondrial stat3 as a regulator for  
7 lymphocyte function. *Int J Mol Sci* 19
- 8 Schreiber-Agus N, Chin L, Chen K, Torres R, Rao G, Guida P, Skoultchi AI & DePinho RA  
9 (1995) An amino-terminal domain of Mxi1 mediates anti-myc oncogenic activity and  
10 interacts with a homolog of the Yeast Transcriptional Repressor SIN3. *Cell* 80: 777–786
- 11 Sckisel GD, Mirsoian A, Minnar CM, Crittenden M, Curti B, Chen JQ, Blazar BR, Borowsky  
12 AD, Monjazeb AM & Murphy WJ (2017) Differential phenotypes of memory CD4 and  
13 CD8 T cells in the spleen and peripheral tissues following immunostimulatory therapy. *J*  
14 *Immunother Cancer* 5: 1–11
- 15 Setoguchi R, Hori S, Takahashi T & Sakaguchi S (2005) Homeostatic maintenance of natural  
16 Foxp3<sup>+</sup> CD25<sup>+</sup> CD4<sup>+</sup> regulatory T cells by interleukin (IL)-2 and induction of  
17 autoimmune disease by IL-2 neutralization. *J Exp Med* 201: 723–735
- 18 Sun I-H, Oh M-H, Zhao L, Patel CH, Arwood ML, Xu W, Tam AJ, Blosser RL, Wen J &  
19 Powell JD (2018) mTOR Complex 1 Signaling Regulates the Generation and Function  
20 of Central and Effector Foxp3<sup>+</sup> Regulatory T Cells . *J Immunol* 201: 481–492
- 21 Sun Z, Unutmaz D, Zou YR, Sunshine MJ, Pierani A, Brenner-Morton S, Mebius RE &  
22 Littman DR (2000) Requirement for ROR $\gamma$  in thymocyte survival and lymphoid organ  
23 development. *Science* (80- ) 288: 2369–2373
- 24 Suzuki K, Bose P, Leong-Quong RY, Fujita DJ & Riabowol K (2010) REAP: A two minute  
25 cell fractionation method. *BMC Res Notes* 3: 294
- 26 Taghon T, Yui MA, Pant R, Diamond RA & Rothenberg E V. (2006) Developmental and

- 1        molecular characterization of emerging  $\beta$ - and  $\gamma\delta$ -selected pre-T cells in the adult mouse  
2        thymus. *Immunity* 24: 53–64
- 3        Tan JT, Dudl E, LeRoy E, Murray R, Sprent J, Weinberg KI & Surh CD (2001) IL-7 is  
4        critical for homeostatic proliferation and survival of naïve T cells. *Proc Natl Acad Sci U*  
5        *SA* 98: 8732–8737
- 6        Tanaka S, Suto A, Iwamoto T, Kashiwakuma D, Kagami S ichiro, Suzuki K, Takatori H,  
7        Tamachi T, Hirose K, Onodera A, *et al* (2014) Sox5 and c-Maf cooperatively induce  
8        Th17 cell differentiation via ROR $\gamma$ t induction as downstream targets of Stat3. *J Exp Med*  
9        211: 1857–1874
- 10        Tsai W Bin, Long Y, Chang JT, Savaraj N, Feun LG, Jung M, Chen HHW & Kuo MT (2017)  
11        Chromatin remodeling system p300-HDAC2-Sin3A is involved in Arginine Starvation-  
12        Induced HIF-1 $\alpha$  Degradation at the ASS1 promoter for ASS1 Derepression. *Sci Rep* 7:  
13        1–12
- 14        Ventura A, Kirsch DG, McLaughlin ME, Tuveson DA, Grimm J, Lintault L, Newman J,  
15        Reczek EE, Weissleder R & Jacks T (2007) Restoration of p53 function leads to tumour  
16        regression in vivo. *Nature* 445: 661–665
- 17        Wei L, Laurence A, Elias KM & O’Shea JJ (2007) IL-21 is produced by Th17 cells and  
18        drives IL-17 production in a STAT3-dependent manner. *J Biol Chem* 282: 34605–34610
- 19        Wu Q, Nie J, Gao Y, Xu P, Sun Q, Yang J, Han L, Chen Z, Wang X, Lv L, *et al* (2015)  
20        Reciprocal regulation of ROR $\gamma$ t acetylation and function by p300 and HDAC1. *Sci Rep*  
21        5: 1–11
- 22        Xiao Y, Nagai Y, Deng G, Ohtani T, Zhu Z, Zhou Z, Zhang H, Ji MQ, Lough JW, Samanta  
23        A, *et al* (2014) Dynamic interactions between TIP60 and p300 regulate FOXP3 function  
24        through a structural switch defined by a single lysine on TIP60. *Cell Rep* 7: 1471–1480
- 25        Yang R, Lirussi D, Thornton TM, Jelley-Gibbs DM, Diehl SA, Case LK, Madesh M, Taatjes  
26        DJ, Teuscher C, Haynes L, *et al* (2015) Mitochondrial Ca<sup>2+</sup> and membrane potential, an

- 1 alternative pathway for Interleukin 6 to regulate CD4 cell effector function. *Elife* 4: 1–22
- 2 Yang X, Zhang F & Kudlow JE (2002) Recruitment of O-GlcNAc transferase to promoters by  
3 corepressor mSin3A: Coupling protein O-GlcNAcylation to transcriptional repression.  
4 *Cell* 110: 69–80
- 5 Yang XO, Panopoulos AD, Nurieva R, Seon HC, Wang D, Watowich SS & Dong C (2007a)  
6 STAT3 regulates cytokine-mediated generation of inflammatory helper T cells. *J Biol*  
7 *Chem* 282: 9358–9363
- 8 Yang XO, Pappu BP, Nurieva R, Akimzhanov A, Kang HS, Chung Y, Ma L, Shah B,  
9 Panopoulos AD, Schluns KS, *et al* (2007b) T Helper 17 Lineage Differentiation Is  
10 Programmed by Orphan Nuclear Receptors ROR $\alpha$  and ROR $\gamma$ . *Immunity* 28: 29–39
- 11 Ye P, Rodriguez FH, Kanaly S, Stocking KL, Schurr J, Schwarzenberger P, Oliver P, Huang  
12 W, Zhang P, Zhang J, *et al* (2001) Requirement of interleukin 17 receptor signaling for  
13 lung CXC chemokine and granulocyte colony-stimulating factor expression, neutrophil  
14 recruitment, and host defense. *J Exp Med* 194: 519–527
- 15 Yosef N, Shalek AK, Gaublomme JT, Jin H, Lee Y, Awasthi A, Wu C, Karwacz K, Xiao S,  
16 Jorgolli M, *et al* (2013) Dynamic regulatory network controlling TH 17 cell  
17 differentiation. *Nature* 496: 461–468
- 18 Zhang F, Meng G & Strober W (2008) Interactions among the transcription factors Runx1,  
19 ROR $\gamma$ t and Foxp3 regulate the differentiation of interleukin 17-producing T cells. *Nat*  
20 *Immunol* 9: 1297–1306
- 21 Zhou L, Ivanov II, Spolski R, Min R, Shenderov K, Egawa T, Levy DE, Leonard WJ &  
22 Littman DR (2007) IL-6 programs TH-17 cell differentiation by promoting sequential  
23 engagement of the IL-21 and IL-23 pathways. *Nat Immunol* 8: 967–974
- 24 Zhou L, Lopes JE, Chong MMW, Ivanov II, Min R, Victora GD, Shen Y, Du J, Rubtsov YP,  
25 Rudensky AY, *et al* (2008) TGF- $\beta$ -induced Foxp3 inhibits TH17 cell differentiation by  
26 antagonizing ROR $\gamma$ t function. *Nature* 453: 236–240

1 Zorn E, Nelson EA, Mohseni M, Porcheray F, Kim H, Litsa D, Bellucci R, Raderschall E,  
2 Canning C, Soiffer RJ, *et al* (2006) IL-2 regulates FOXP3 expression in human  
3 CD4+CD25+ regulatory T cells through a STAT-dependent mechanism and induces the  
4 expansion of these cells in vivo. *Blood* 108: 1571–1579  
5  
6

1 **Figure legends**

2 **Figure 1. CD4-cre-driven Sin3A deletion halts further CD4 and CD8 thymocyte**  
3 **development. A-B.** Representative flow cytometry analysis of CD4<sup>+</sup> and CD8<sup>+</sup> thymocytes  
4 **(A)**, and frequencies of DN, DP and SP cells in Sin3A<sup>+/+</sup> and Sin3A<sup>CD4Δ</sup> mice **(B)**. N=5. **C.**  
5 Sin3A intracellular levels in DN, DP, CD8SP and CD4SP cells from Sin3A<sup>+/+</sup> and Sin3A<sup>CD4Δ</sup>  
6 mice. **D-E.** Representative FACS of splenic CD4<sup>+</sup> and CD8<sup>+</sup> cells **(D)** and frequencies **(E)**.  
7 N=6. **F-G.** Representative dot plots of CD44 and CD62L levels of gated CD4<sup>+</sup> viable T cells  
8 **(F)** and quantification **(G)**. N=6. **H.** Representative dot plots of CD44 and Sin3A levels in  
9 Sin3A<sup>+/+</sup> and Sin3A<sup>CD4Δ</sup> CD4<sup>+</sup> T cells. **B, E, G.** Bars: Mean. Error bars: SD. Two-tailed  
10 unpaired Student's T-test.

11

12 **Figure 2. Sin3A levels are increased over the course of activation and differentiation. A.**  
13 Representative flow cytometric analysis of Sin3A expression in wild-type CD4<sup>+</sup> T cells kept  
14 for 3 days in IL-7 or differentiated to Th0, Th1, Th17 and Treg. **B.** Kinetics of Sin3A  
15 upregulation in Th17 conditions. **C.** Graphic representation of *ex-vivo* deletion of Sin3A. CD4<sup>+</sup>  
16 T cells were purified from secondary lymphoid organs derived from Sin3A<sup>F/F</sup> Rosa26-  
17 CreER<sup>T2/+</sup> mice, and kept in IL-7 for 3 days in the absence or the presence of 4-hydroxy  
18 tamoxifen (TAM). Cells were then harvested and cultured for an additional 3 days in Th17  
19 skewing conditions in the absence or the presence of TAM. **D.** Flow cytometric and **E.** Western  
20 blot analyses of Sin3A levels.

21

22 **Figure 3. Conditional deletion of Sin3A allows cell differentiation and imprints T cells**  
23 **with a mTORC1 signature.** Sin3A<sup>F/F</sup> Rosa26-CreER<sup>T2</sup> CD4<sup>+</sup> T cells were treated as described  
24 in Figure 2. **A.** Proliferation profiles of untreated (NT) and TAM-treated (TAM) cells labeled  
25 with Tag-IT Violet, and kept for 3 days in Th17 conditions. **B.** Quantification of cell division  
26 cycle according to Tag-IT Violet dilution profiles, N=5. **C.** Relative cell numbers (day 3/day



1 0). N=6. **D.** Contour plots depicting relative CD44 and CD62L expression after gating on viable  
2 lymphocytes **E.** Bar plots showing relative frequencies of effector memory (Tem), central  
3 memory (Tcm) and naïve cells viable lymphocytes, N=5. **F-H.** RNA-seq transcriptomic  
4 analysis of CD4<sup>+</sup> T cells derived from Rosa26-CreER<sup>T2</sup> Sin3A<sup>F/F</sup> mice cultured for 3 days in  
5 IL-7 in the absence or the presence of tamoxifen (basal, basal TAM) and then cultured for 3  
6 additional days in Th17 polarizing conditions (Day3 or Day3TAM). Principal component  
7 analyses (**F**). Volcano plot of differentially expressed genes (**FDR<0.05; vertical dashed lines**  
8 **indicate fold change values Long2 fold change 1-1**) (**G**) Gene Set Enrichment analysis (**H**)  
9 highlights a signature compatible with an MTORC1 signaling pathway (Genes up-regulated  
10 through activation of mTORC1 complex).

11

12 **Figure 4. Sin3A deficient T cells fail to differentiate in Th17 skewing conditions.** Sin3A<sup>F/F</sup>  
13 Rosa26-CreER<sup>T2</sup> CD4 T cells treated or not with TAM were kept for 3 days in Th17-skewing  
14 conditions as described in Figure 2. Cells were then left untreated or stimulated with  
15 PMA/ionomycin (PI) for 4h, and analyzed by intracellular cytokine staining (**A-B**) or RT-PCR  
16 (**C-D**). **A.** Representative dot plots and **B.** bar plots showing the percentage of cells expressing  
17 IL-17A<sup>+</sup> and IFN $\gamma$ <sup>+</sup> (N=5). **C-D.** RT-PCR analysis of indicated gene expression after PI  
18 stimulation. Relative levels are depicted: *IL17a*, *ifng*, *Il17f*, *Il21* (N=7), *Il22* (N=4). *Il23r* levels  
19 were analyzed without re-stimulation (N=7). Bars: Mean. Error bars: SD. Two-tailed paired  
20 Student's T-test.

21

22 **Figure 5. STAT3 and ROR $\gamma$ t are expressed in Sin3A-deficient cells lacking IL17A.** **A.**  
23 Schematic representation of STAT3 and ROR $\gamma$ t-driven events over Th17 differentiation. **B-E.**  
24 Representative western blot of total (**B**) and nuclear (**C**) STAT3 and pSTAT3 (ser727) in  
25 control (NT) and Sin3A-deleted Th17-skewed CD4<sup>+</sup> T cells (TAM), and quantification of  
26 relative representation over independent experiments (**D-E**), N=5. Bars: Mean. Error bars: SD.

1 Two-tailed paired Student's T-test, except in C. pSTAT3/ $\beta$ -ACTIN: Wilcoxon matched-pairs  
2 signed rank test (not normally distributed according to Shapiro-Wilk test). F. Contour plots  
3 depicting IL-17A and ROR $\gamma$ t levels in viable PMA and Ionomycin stimulated control (NT) and  
4 TAM-treated CD4<sup>+</sup> T cells. G. Representative histograms of ROR $\gamma$ t protein levels and H.  
5 relative expression (Relative Fluorescence Intensity, TAM relative to NT), N=8. I. RT-PCR  
6 analysis of *Rorc* (N=6) and *Rora* (N=7) gene levels. Relative expression is shown.

7

8 **Figure 6. Sin3A inactivation leads to the upregulation of Foxp3, able to limit IL-17A.** Cells  
9 were cultured as depicted in Figure 2 and analyzed after PMA and Ionomycin stimulation for  
10 4h. A. Representative contour plots and B. percentages of IL-17A<sup>+</sup> and Foxp3<sup>+</sup> cells, N=10. C.  
11 RT-PCR analysis of *Foxp3* expression N=7. D. Cells were cultured as depicted in Figure 2 in  
12 the absence or the presence of the P60 Foxp3 inhibitor. Cells were then harvested and stimulated  
13 with PMA and ionomycin for 4h. Bar plots report the percentage of IL-17A<sup>+</sup> cells relative to  
14 untreated controls, N=6. Error bars: SD. Two-tailed paired Student's T-test.

15

16 **Figure 7. Sin3A inactivation favors IL-2 upregulation, which neutralization halts Foxp3**  
17 **and rescues IL-17A expression.** A-B) Cells were cultured as depicted in Figure 2 and then  
18 stimulated with PMA and Ionomycin for 4h. A. Representative contour plots and B. percentages  
19 of IL-2<sup>+</sup> cells, N=7. C. RT-PCR analysis of *Il2* expression, N=7. D-E) Cells were cultured as  
20 depicted in Figure 2 in the absence or the presence of a neutralizing anti-IL-2 mAb. D. Bar plot  
21 depicting the frequency of Foxp3<sup>+</sup>, N=5 and E. relative IL-17A<sup>+</sup> cells, N=10. F. Relative  
22 increase in IL-17A<sup>+</sup> Sin3A sufficient and deficient cells with respect to the dose of anti-IL-2  
23 mAb, N=3. G. Correlation of the relative increase in IL-17A<sup>+</sup> cells in the presence of anti-IL-2  
24 antibody and the percentage of IL-2<sup>+</sup> cells in TAM-treated cells. Bars: Mean. Error bars: SD.  
25 Two-tailed paired Student's T-test.

26

1 **Figure 8. Sin3A controls Th17 cell differentiation, logistic model and schematic**  
2 **representation of the working model. A.** Logistic model. The scatter plots represent the  
3 percentages of cells positive for the indicated markers. TAM-treated and untreated cells are  
4 indicated in red and blue, respectively. A logistic model was fit for the classification of samples  
5 as TAM-treated or untreated cells based on the markers shown in each plot. The red and blue  
6 areas represent the ranges in which samples are classified as TAM-treated and untreated with  
7 95% confidence based on the fitted models, respectively. The black line represents the decision  
8 limit at which samples are equally likely to be TAM-treated or untreated. **B.** Schematic  
9 representation of data-generated working model. In Sin3A sufficient cells, Sin3A limits IL-2  
10 expression, allowing for STAT3 and ROR $\gamma$ t to jointly instruct the expression of *Il17a* (and of  
11 *Il17f*, *Il22* and *Il23R*). In Sin3A deficient cells, IL-2 is no longer kept under check, Foxp3 is  
12 induced, likely via mTORC1 and STAT3 signaling, hindering *Il17a* (and of *Il17f*, *Il22* and  
13 *Il23R* expression). STAT5, which activation is increased in cells lacking Sin3A, is also likely  
14 to contribute to the upregulation of Foxp3 and the inhibition of IL-17A. The figure was created  
15 with BioRender.com.

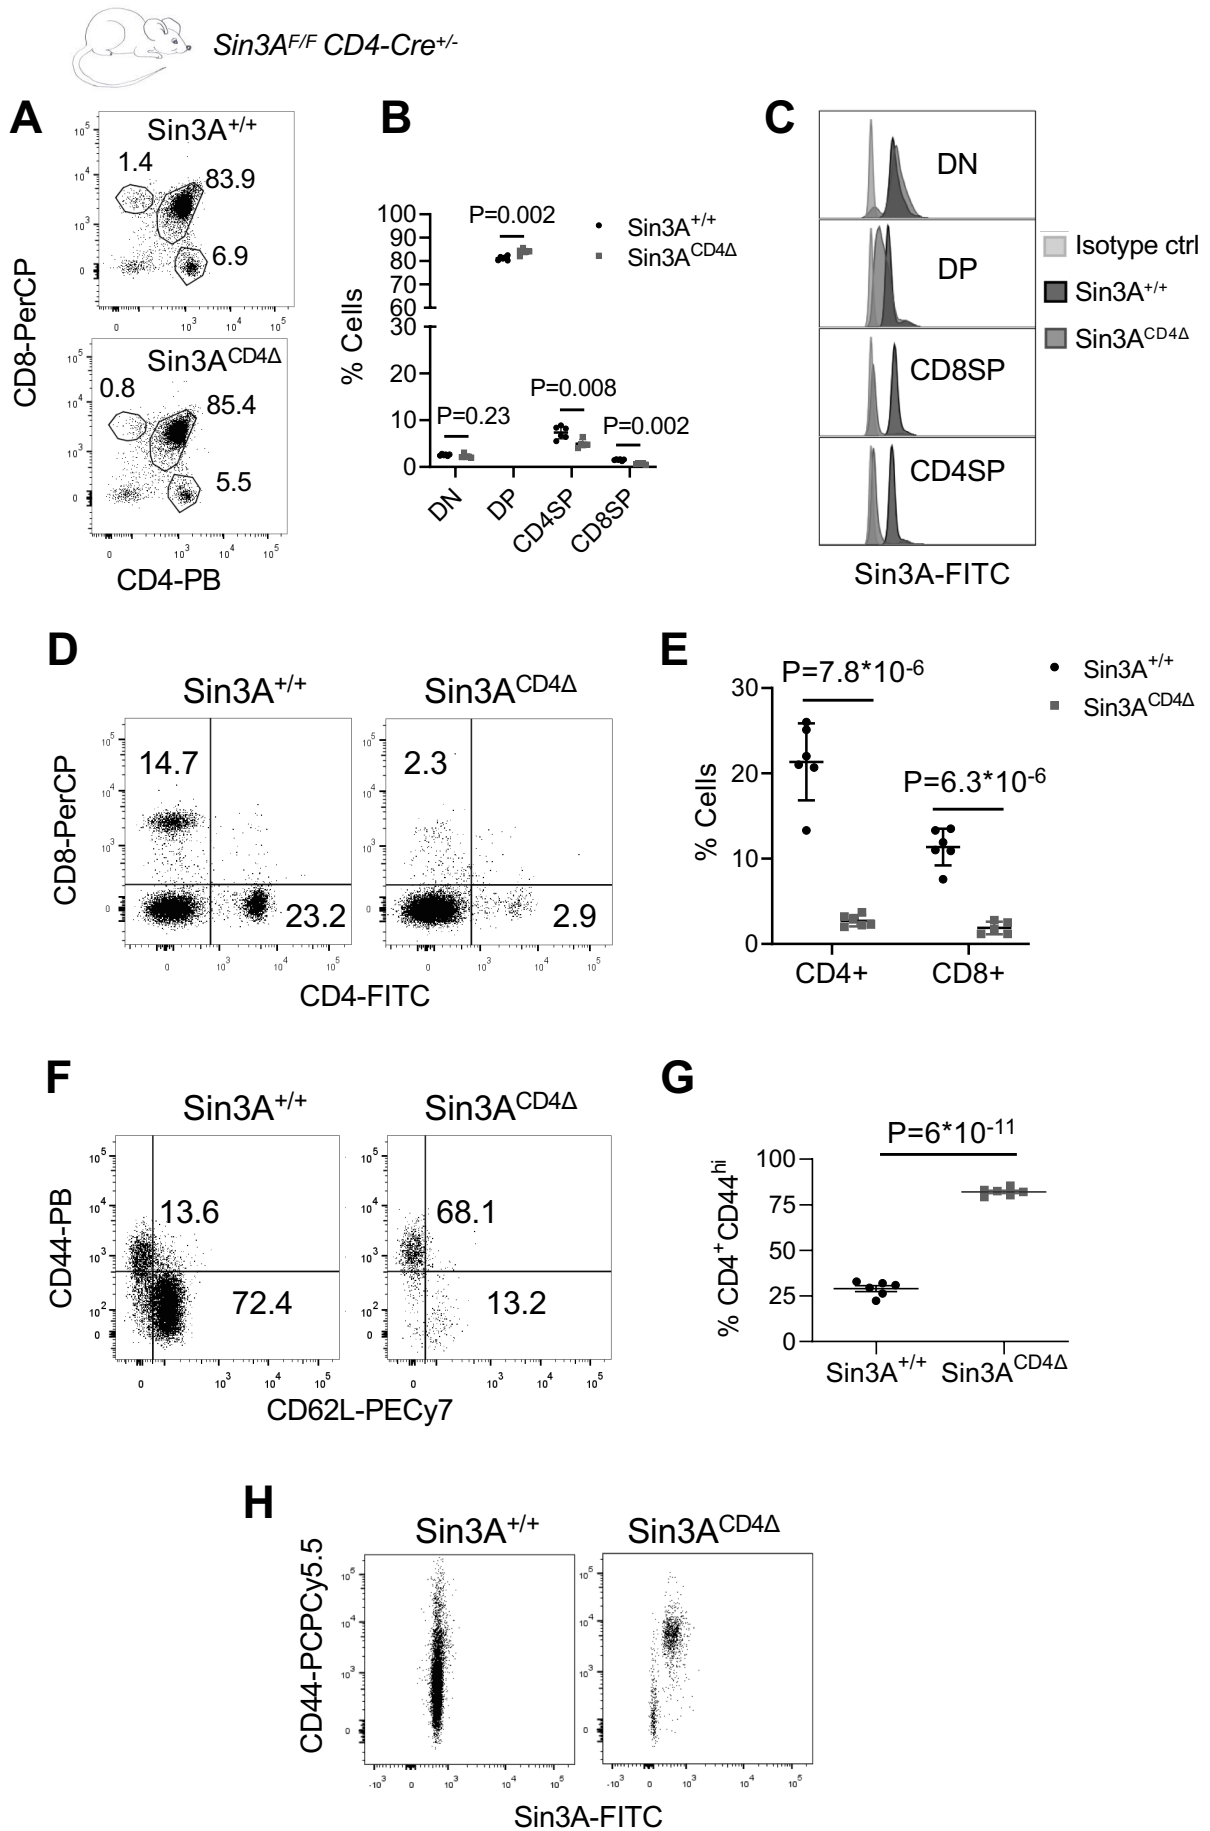

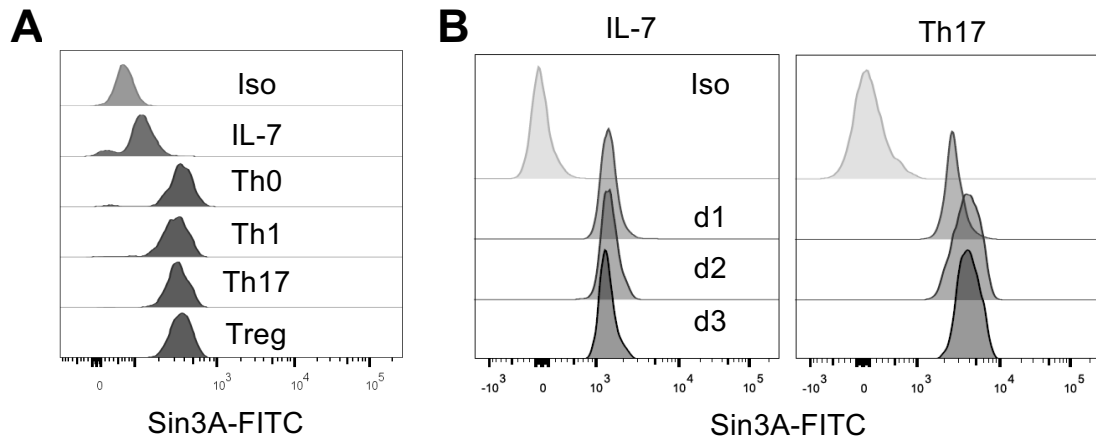

**C** *Sin3A<sup>F/F</sup> R26-CreERT2<sup>+/-</sup> CD4<sup>+</sup>*

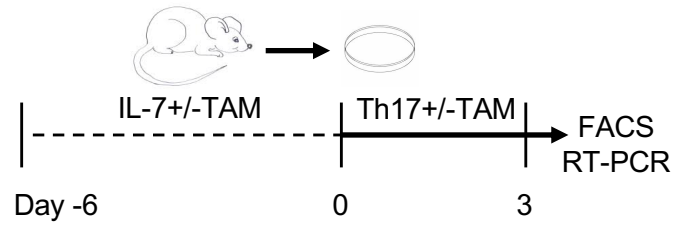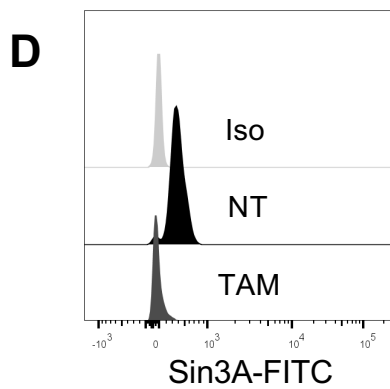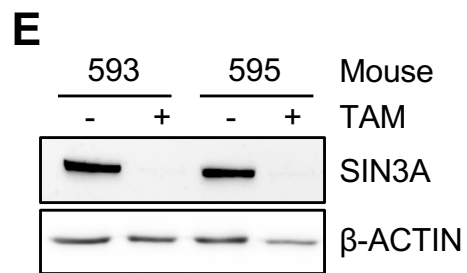

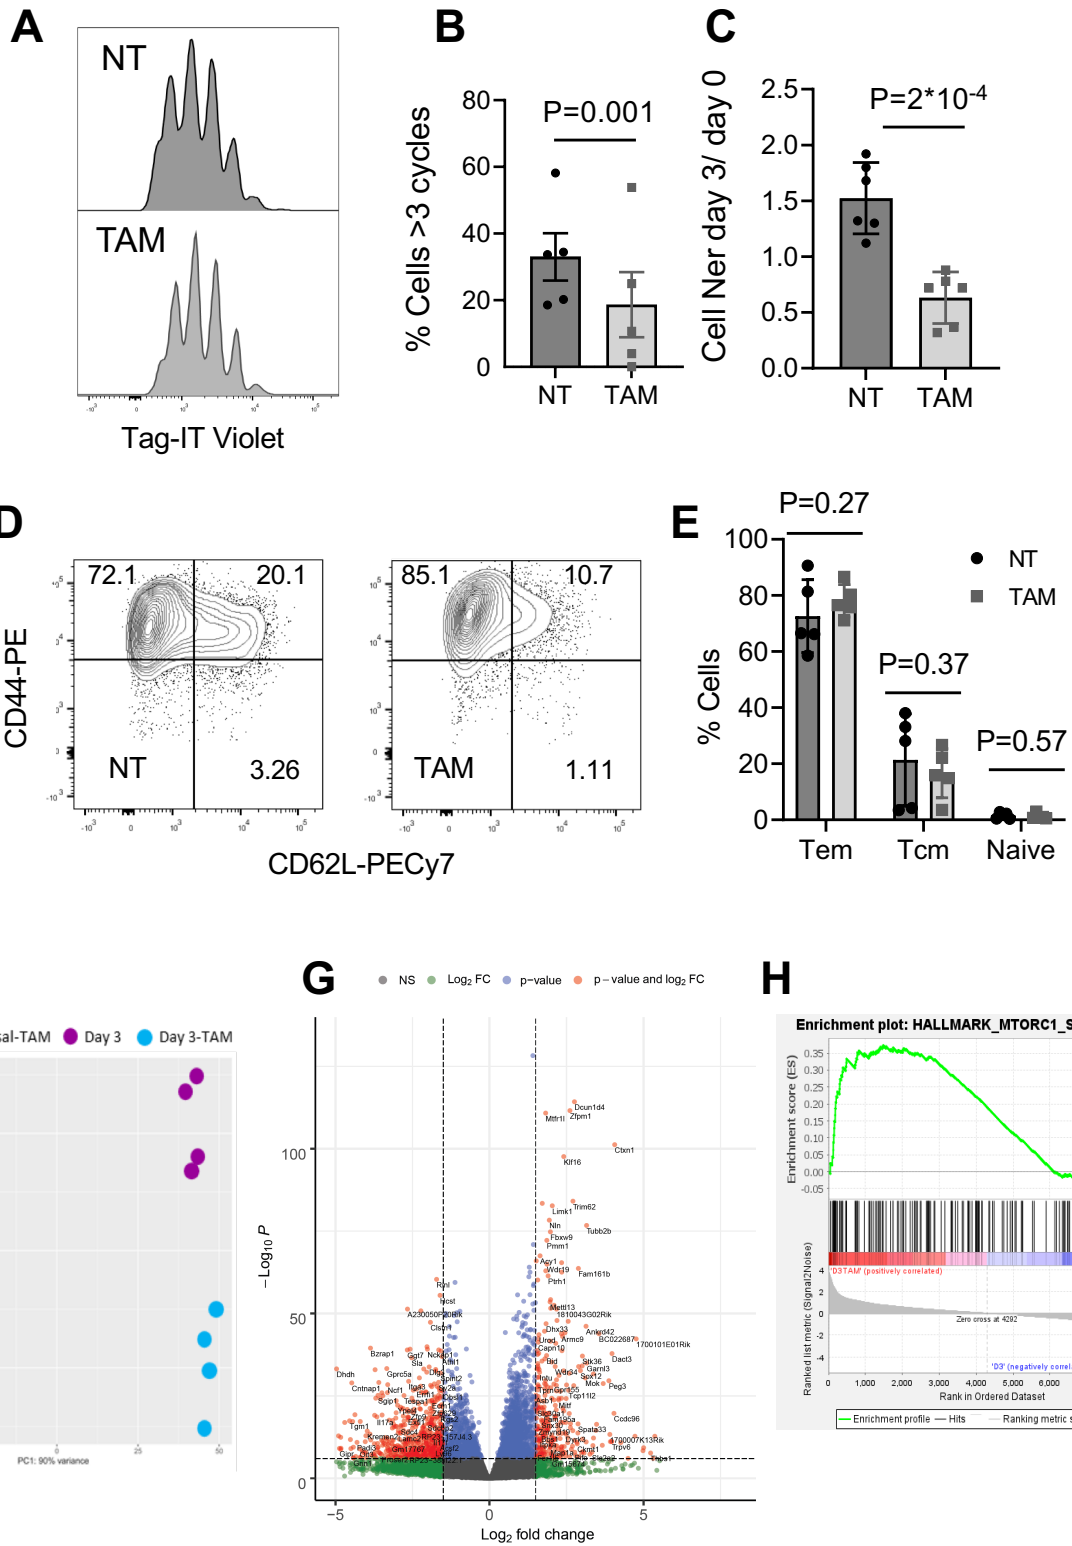

Perucho et al. Figure 3

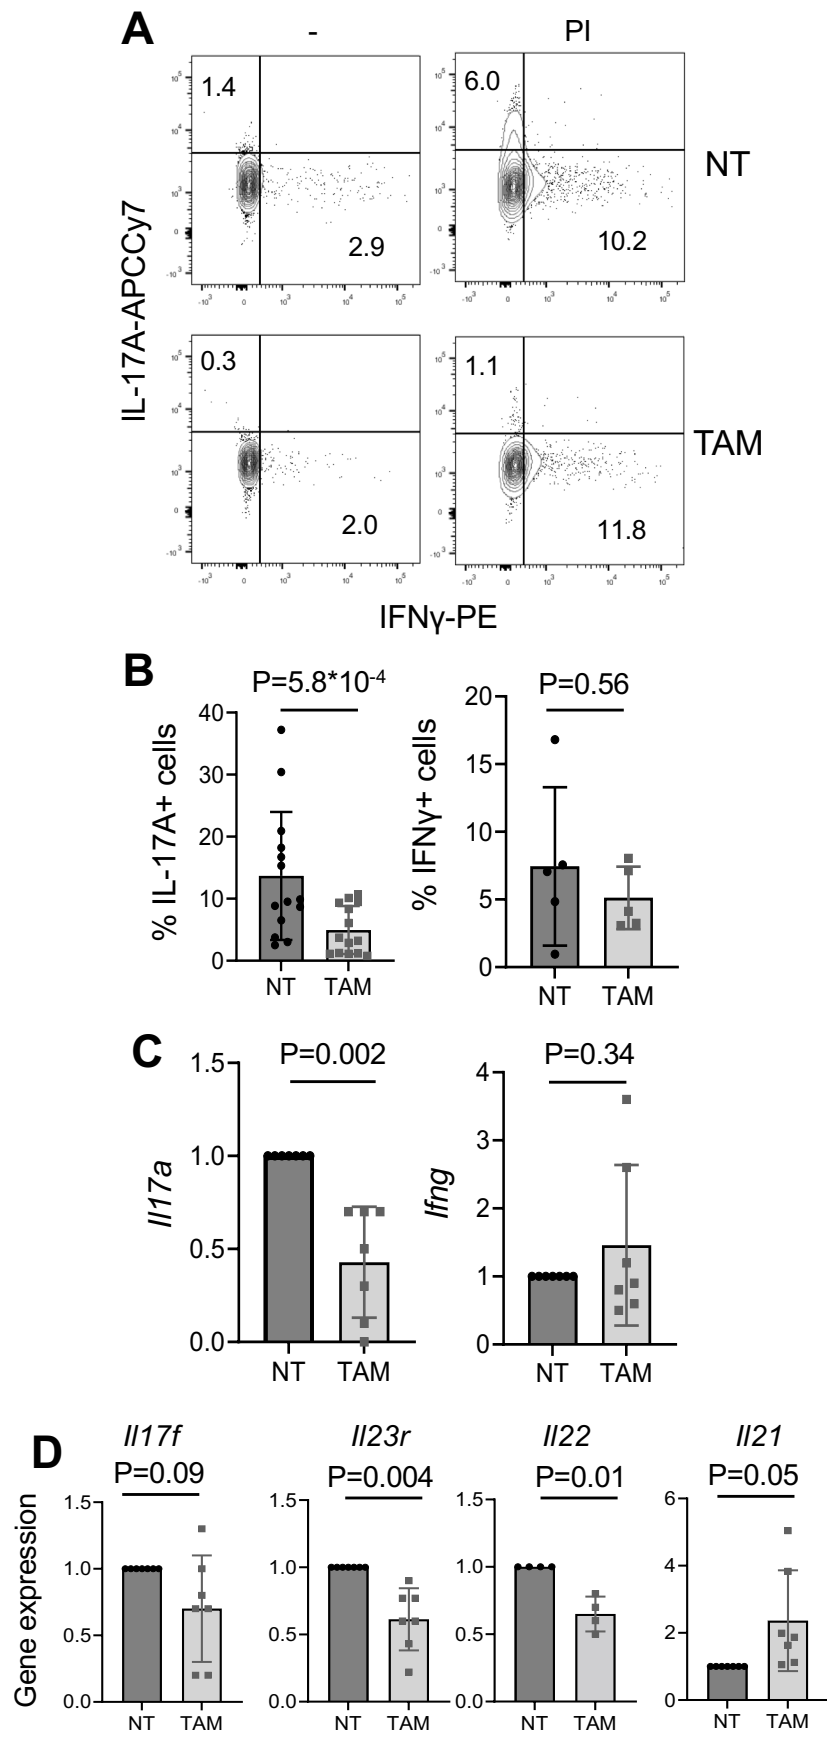

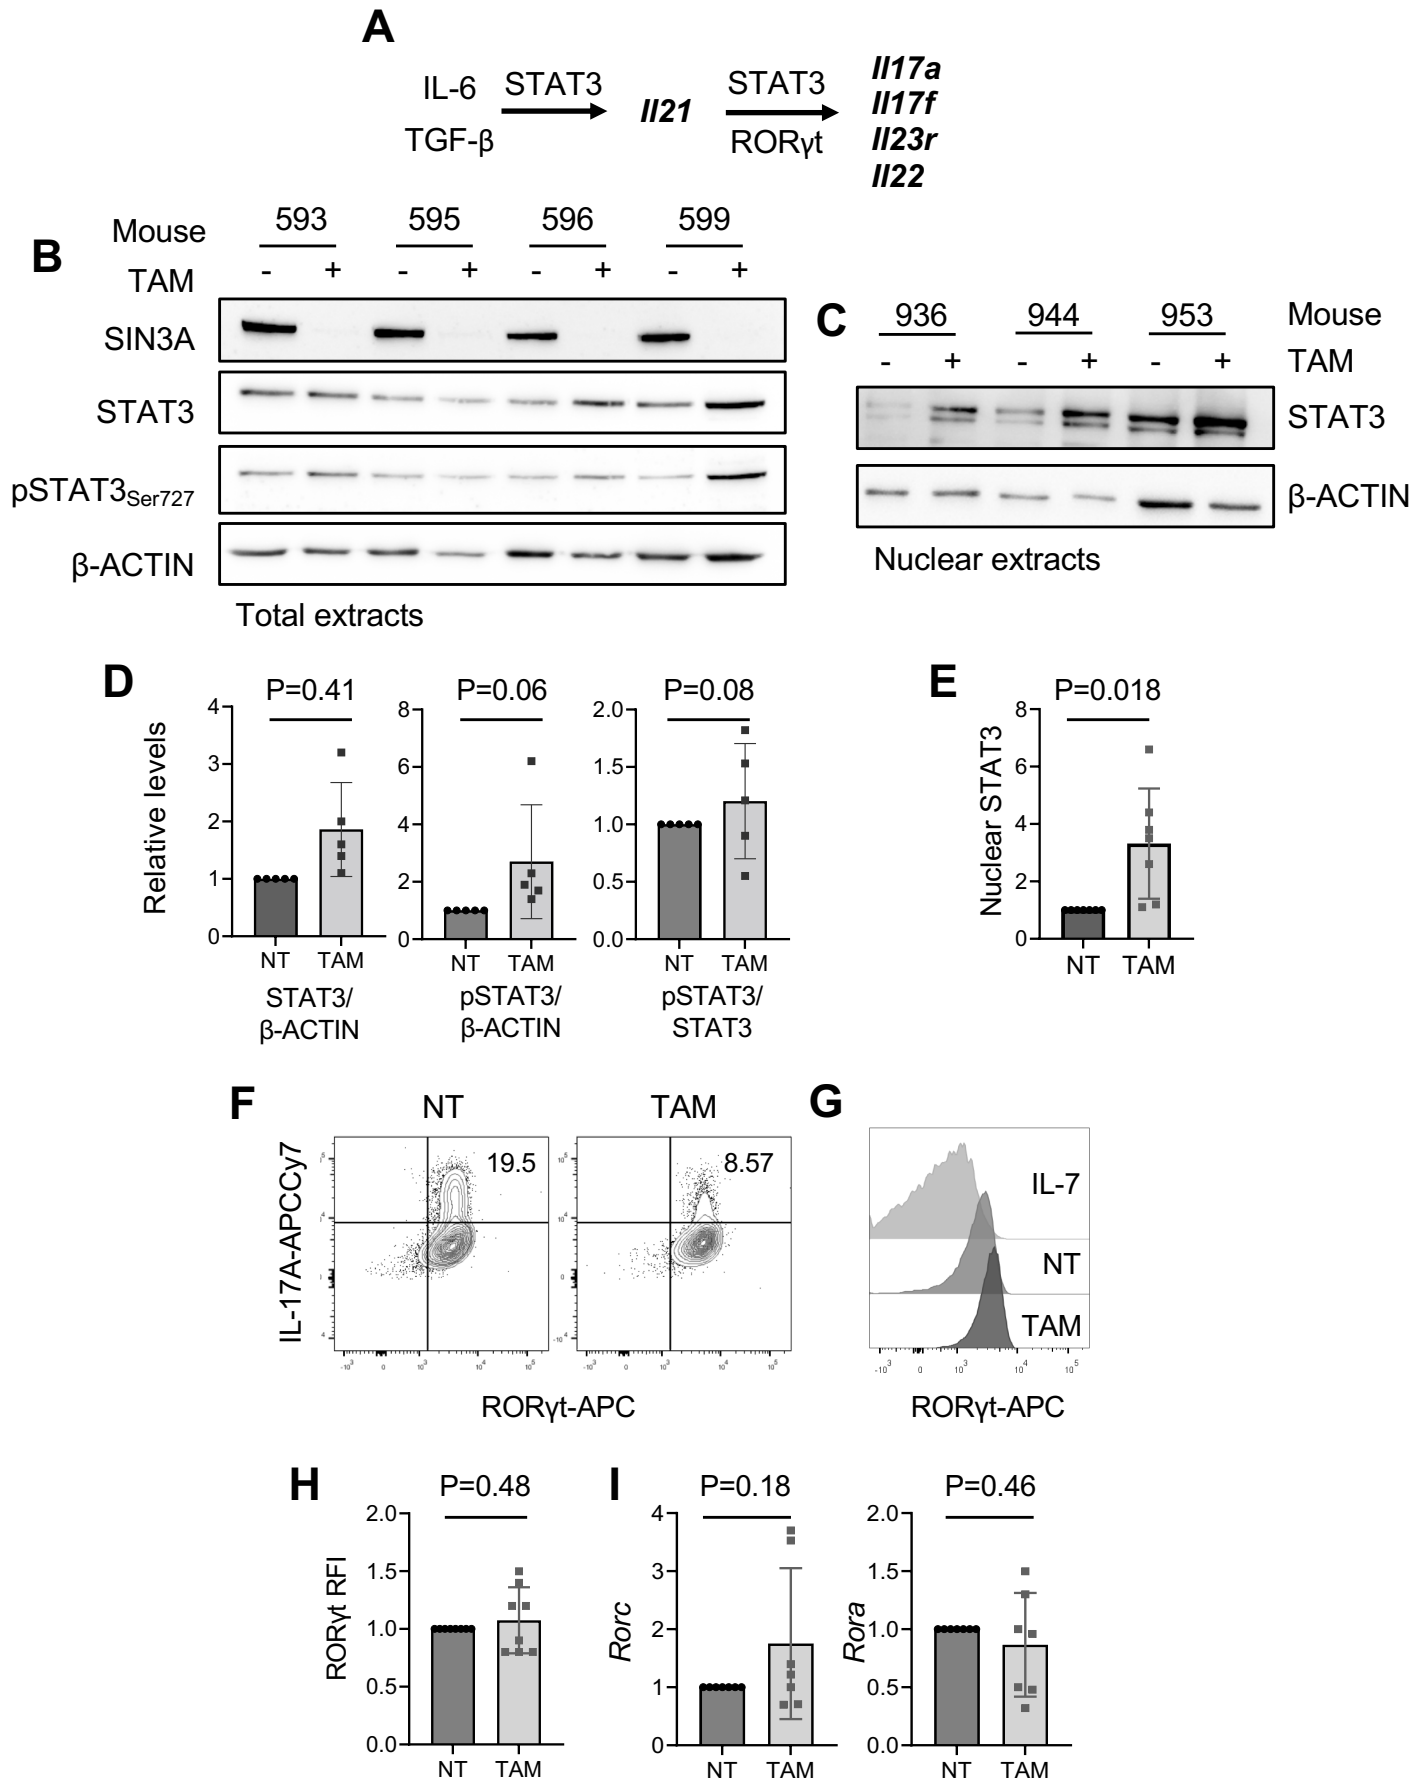



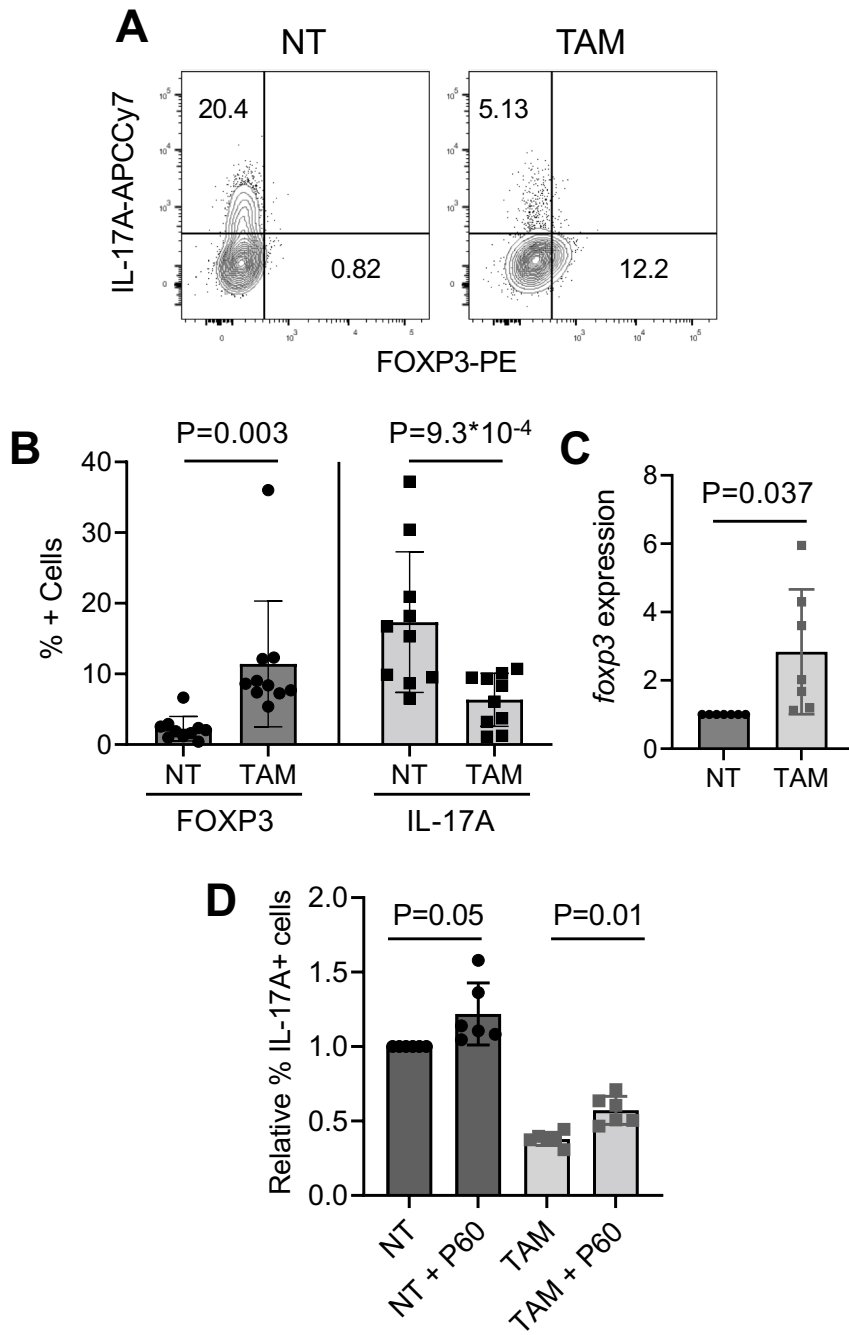

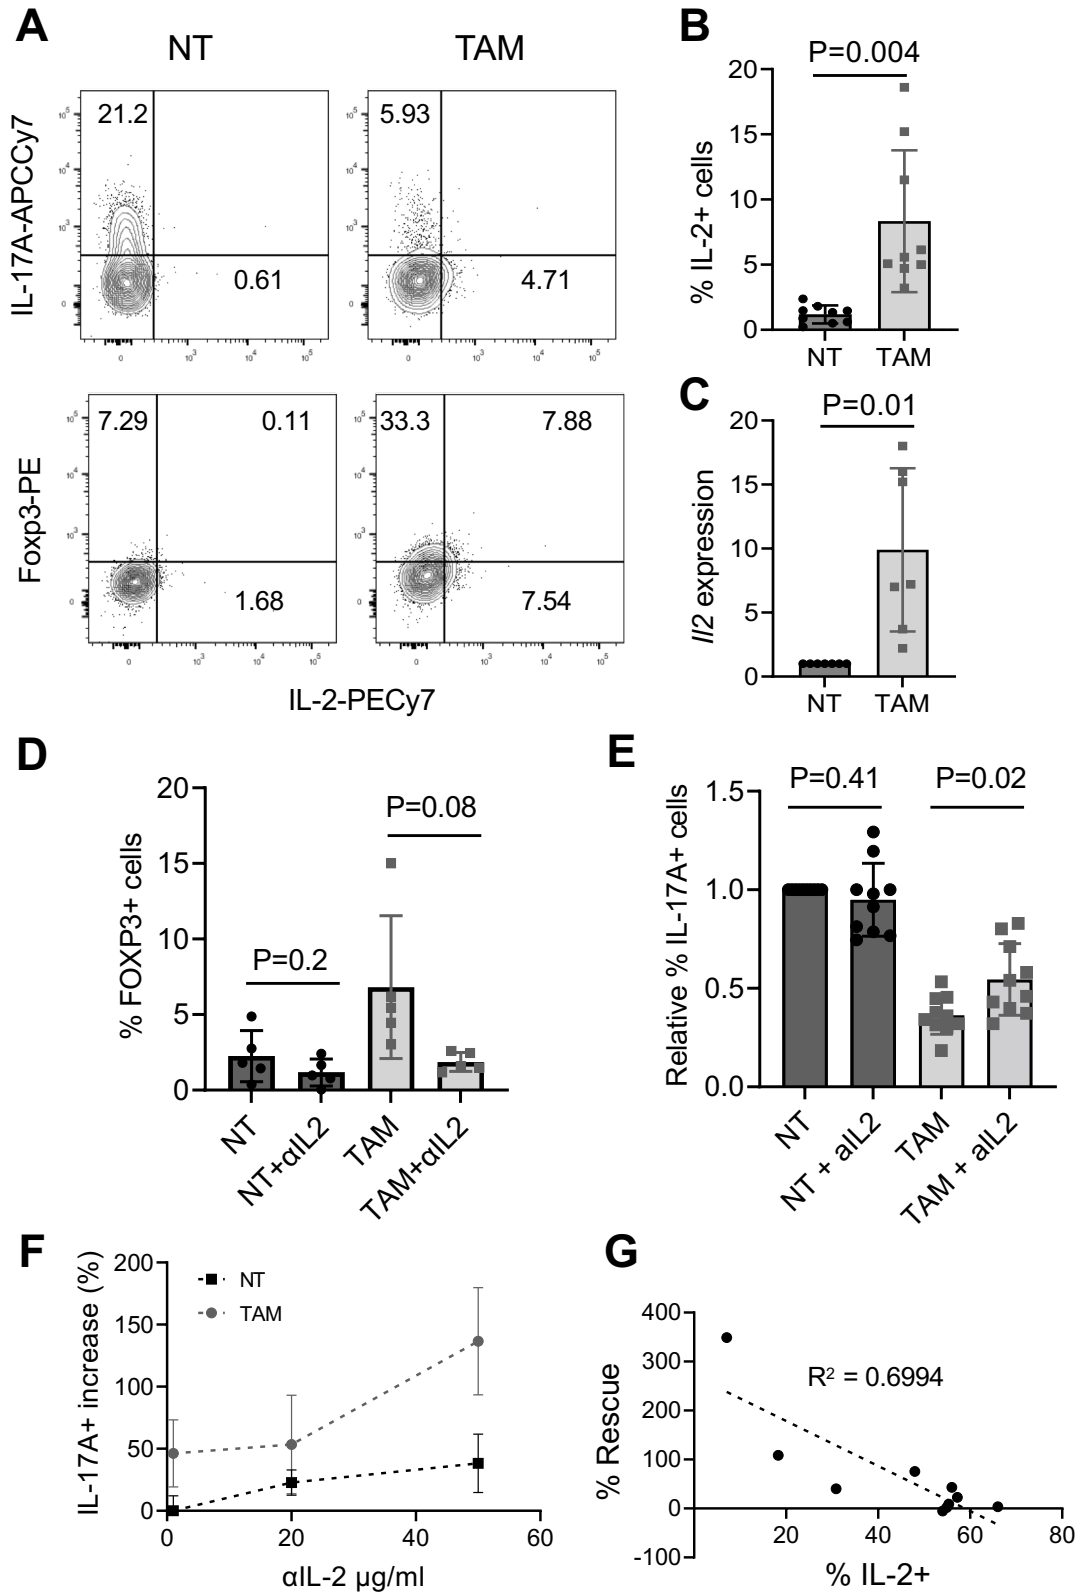

**A**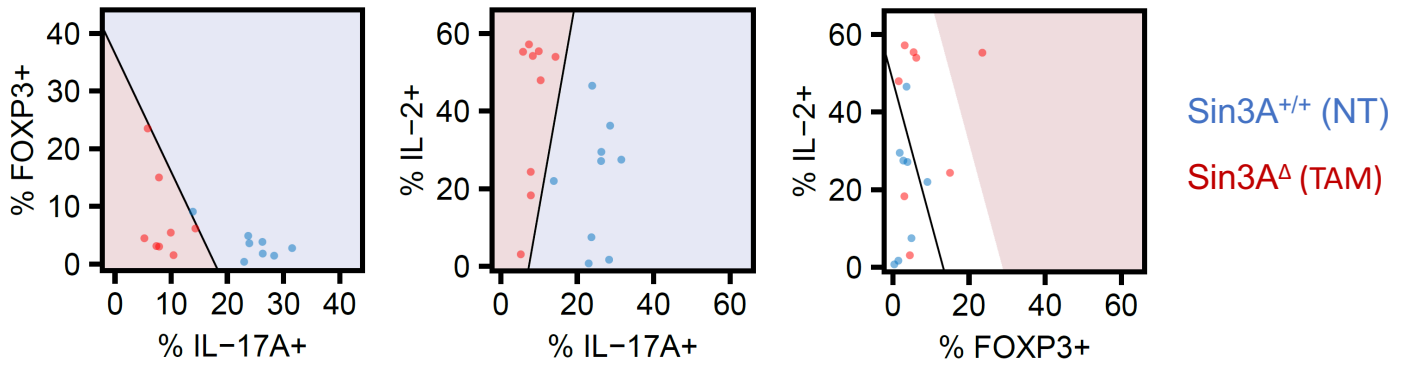**B**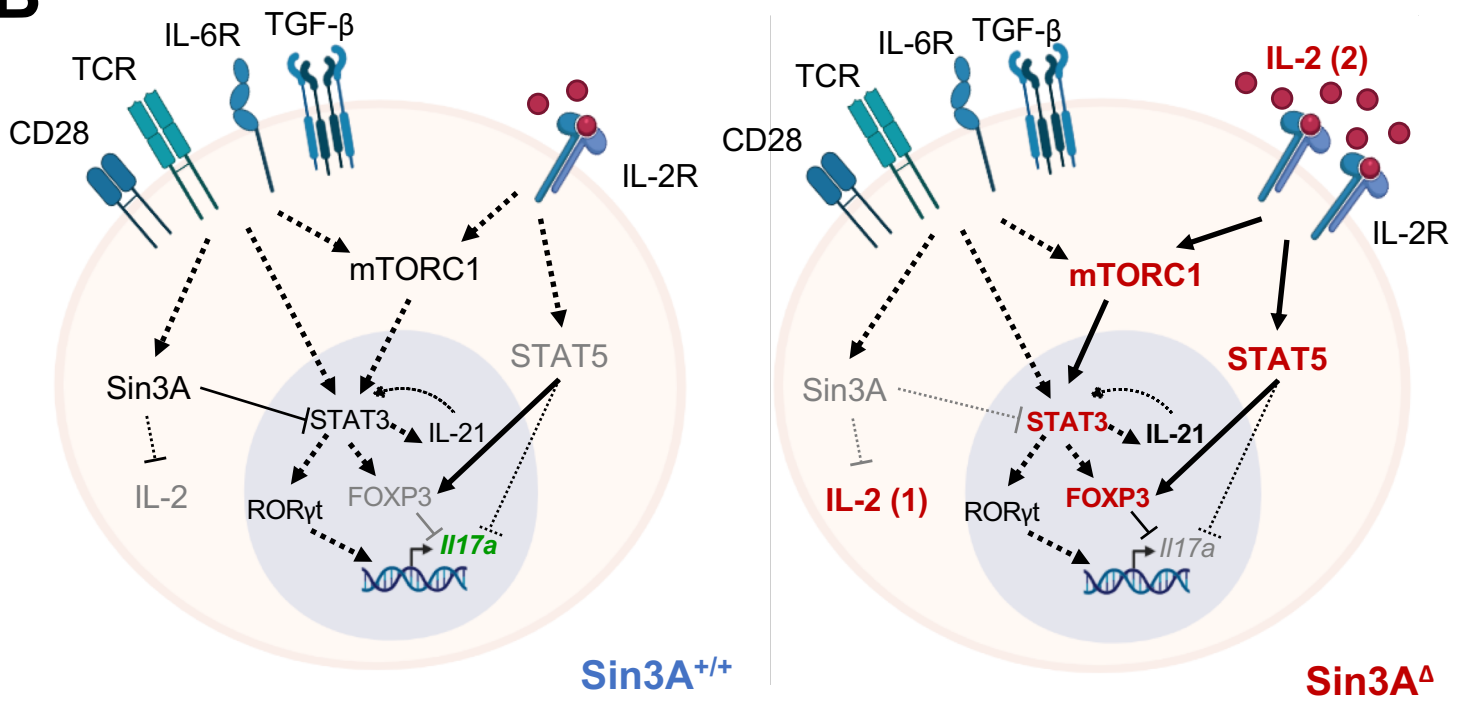

Source: https://www.biorxiv.org/content/10.1101/2022.04.19.488789v1.full.pdf
